# Supplementary material
Source: publisher site journal article supplement (https://www.dovepress.com/article/399277)
Supplement: Supplementary file 1 [file get_supplementary_file.php]

## Supplementary table 1

| ID         | Description           | GeneRatio | BgRatio   | pvalue      | p.adjust    | qvalue      |
|------------|-----------------------|-----------|-----------|-------------|-------------|-------------|
| GO:0002052 | positive regul 2/29   |           | 23/18723  | 0.000574358 | 0.128113766 | 0.090943995 |
| GO:0019730 | antimicrobial 3/29    |           | 122/18723 | 0.000871494 | 0.128113766 | 0.090943995 |
| GO:1902692 | regulation of 2/29    |           | 33/18723  | 0.001187209 | 0.128113766 | 0.090943995 |
| GO:0060428 | lung epitheliu 2/29   |           | 37/18723  | 0.001491766 | 0.128113766 | 0.090943995 |
| GO:0002920 | regulation of 2/29    |           | 45/18723  | 0.002200544 | 0.128113766 | 0.090943995 |
| GO:2000179 | positive regul 2/29   |           | 54/18723  | 0.003153471 | 0.128113766 | 0.090943995 |
| GO:0042220 | response to c 2/29    |           | 55/18723  | 0.003269337 | 0.128113766 | 0.090943995 |
| GO:0051898 | negative regu 2/29    |           | 55/18723  | 0.003269337 | 0.128113766 | 0.090943995 |
| GO:0007405 | neuroblast pr 2/29    |           | 58/18723  | 0.00362876  | 0.128113766 | 0.090943995 |
| GO:0034329 | cell junction ε 4/29  |           | 420/18723 | 0.003802407 | 0.128113766 | 0.090943995 |
| GO:0006500 | N-terminal pr 1/29    |           | 3/18723   | 0.004639745 | 0.128113766 | 0.090943995 |
| GO:0021769 | orbitofrontal 1/29    |           | 3/18723   | 0.004639745 | 0.128113766 | 0.090943995 |
| GO:0030997 | regulation of 1/29    |           | 3/18723   | 0.004639745 | 0.128113766 | 0.090943995 |
| GO:0044467 | glial cell-deriv 1/29 |           | 3/18723   | 0.004639745 | 0.128113766 | 0.090943995 |
| GO:0051586 | positive regul 1/29   |           | 3/18723   | 0.004639745 | 0.128113766 | 0.090943995 |
| GO:0051944 | positive regul 1/29   |           | 3/18723   | 0.004639745 | 0.128113766 | 0.090943995 |
| GO:0060160 | negative regu 1/29    |           | 3/18723   | 0.004639745 | 0.128113766 | 0.090943995 |
| GO:0060535 | trachea cartil 1/29   |           | 3/18723   | 0.004639745 | 0.128113766 | 0.090943995 |
| GO:0072061 | inner medulla 1/29    |           | 3/18723   | 0.004639745 | 0.128113766 | 0.090943995 |
| GO:1900166 | regulation of 1/29    |           | 3/18723   | 0.004639745 | 0.128113766 | 0.090943995 |
| GO:1900168 | positive regul 1/29   |           | 3/18723   | 0.004639745 | 0.128113766 | 0.090943995 |
| GO:1903964 | monounsatur 1/29      |           | 3/18723   | 0.004639745 | 0.128113766 | 0.090943995 |
| GO:0070830 | bicellular tigh 2/29  |           | 70/18723  | 0.005241004 | 0.128113766 | 0.090943995 |
| GO:0009410 | response to x 4/29    |           | 462/18723 | 0.005330036 | 0.128113766 | 0.090943995 |
| GO:0045824 | negative regu 2/29    |           | 71/18723  | 0.005387761 | 0.128113766 | 0.090943995 |
| GO:0120192 | tight junction 2/29   |           | 74/18723  | 0.005839294 | 0.128113766 | 0.090943995 |
| GO:0022009 | central nervo 1/29    |           | 4/18723   | 0.006181703 | 0.128113766 | 0.090943995 |
| GO:0033602 | negative regu 1/29    |           | 4/18723   | 0.006181703 | 0.128113766 | 0.090943995 |
| GO:0060486 | club cell diffe 1/29  |           | 4/18723   | 0.006181703 | 0.128113766 | 0.090943995 |
| GO:0072236 | metanephric 1/29      |           | 4/18723   | 0.006181703 | 0.128113766 | 0.090943995 |
| GO:0090116 | C-5 methylati 1/29    |           | 4/18723   | 0.006181703 | 0.128113766 | 0.090943995 |
| GO:0090325 | regulation of 1/29    |           | 4/18723   | 0.006181703 | 0.128113766 | 0.090943995 |
| GO:0110024 | positive regul 1/29   |           | 4/18723   | 0.006181703 | 0.128113766 | 0.090943995 |
| GO:2000545 | negative regu 1/29    |           | 4/18723   | 0.006181703 | 0.128113766 | 0.090943995 |
| GO:0043297 | apical junctio 2/29   |           | 78/18723  | 0.006467405 | 0.128113766 | 0.090943995 |
| GO:0061844 | antimicrobial 2/29    |           | 79/18723  | 0.00662905  | 0.128113766 | 0.090943995 |
| GO:0120193 | tight junction 2/29   |           | 80/18723  | 0.006792529 | 0.128113766 | 0.090943995 |
| GO:0002088 | lens developr 2/29    |           | 84/18723  | 0.007464688 | 0.128113766 | 0.090943995 |
| GO:0006116 | NADH oxidati 1/29     |           | 5/18723   | 0.007721354 | 0.128113766 | 0.090943995 |
| GO:0021869 | forebrain ven 1/29    |           | 5/18723   | 0.007721354 | 0.128113766 | 0.090943995 |
| GO:0021873 | forebrain neu 1/29    |           | 5/18723   | 0.007721354 | 0.128113766 | 0.090943995 |
| GO:0042321 | negative regu 1/29    |           | 5/18723   | 0.007721354 | 0.128113766 | 0.090943995 |
| GO:0051582 | positive regul 1/29   |           | 5/18723   | 0.007721354 | 0.128113766 | 0.090943995 |
| GO:0060510 | type II pneur 1/29    |           | 5/18723   | 0.007721354 | 0.128113766 | 0.090943995 |
| GO:1904848 | negative regu 1/29    |           | 5/18723   | 0.007721354 | 0.128113766 | 0.090943995 |
| GO:2000177 | regulation of 2/29    |           | 87/18723  | 0.0079878   | 0.128113766 | 0.090943995 |
| GO:0051781 | positive regul 2/29   |           | 89/18723  | 0.008345502 | 0.128113766 | 0.090943995 |

|            |                      |           |             |             |             |
|------------|----------------------|-----------|-------------|-------------|-------------|
| GO:0007195 | adenylate cyc 1/29   | 6/18723   | 0.009258702 | 0.128113766 | 0.090943995 |
| GO:0007270 | neuron-neurc 1/29    | 6/18723   | 0.009258702 | 0.128113766 | 0.090943995 |
| GO:0021853 | cerebral cortε 1/29  | 6/18723   | 0.009258702 | 0.128113766 | 0.090943995 |
| GO:0032776 | DNA methyla 1/29     | 6/18723   | 0.009258702 | 0.128113766 | 0.090943995 |
| GO:0032911 | negative regul 1/29  | 6/18723   | 0.009258702 | 0.128113766 | 0.090943995 |
| GO:0033634 | positive regul 1/29  | 6/18723   | 0.009258702 | 0.128113766 | 0.090943995 |
| GO:0051891 | positive regul 1/29  | 6/18723   | 0.009258702 | 0.128113766 | 0.090943995 |
| GO:0060482 | lobar bronchi 1/29   | 6/18723   | 0.009258702 | 0.128113766 | 0.090943995 |
| GO:0070072 | vacuolar prot 1/29   | 6/18723   | 0.009258702 | 0.128113766 | 0.090943995 |
| GO:0071896 | protein locali: 1/29 | 6/18723   | 0.009258702 | 0.128113766 | 0.090943995 |
| GO:0043473 | pigmentation 2/29    | 98/18723  | 0.010042592 | 0.128113766 | 0.090943995 |
| GO:0010720 | positive regul 3/29  | 298/18723 | 0.010740663 | 0.128113766 | 0.090943995 |
| GO:0003310 | pancreatic A c 1/29  | 7/18723   | 0.01079375  | 0.128113766 | 0.090943995 |
| GO:0006498 | N-terminal pr 1/29   | 7/18723   | 0.01079375  | 0.128113766 | 0.090943995 |
| GO:0009637 | response to b 1/29   | 7/18723   | 0.01079375  | 0.128113766 | 0.090943995 |
| GO:0021894 | cerebral cortε 1/29  | 7/18723   | 0.01079375  | 0.128113766 | 0.090943995 |
| GO:0060534 | trachea cartil. 1/29 | 7/18723   | 0.01079375  | 0.128113766 | 0.090943995 |
| GO:0060710 | chorio-allantc 1/29  | 7/18723   | 0.01079375  | 0.128113766 | 0.090943995 |
| GO:0110021 | cardiac muscl 1/29   | 7/18723   | 0.01079375  | 0.128113766 | 0.090943995 |
| GO:0110022 | regulation of 1/29   | 7/18723   | 0.01079375  | 0.128113766 | 0.090943995 |
| GO:1990384 | hyaloid vascu 1/29   | 7/18723   | 0.01079375  | 0.128113766 | 0.090943995 |
| GO:2000210 | positive regul 1/29  | 7/18723   | 0.01079375  | 0.128113766 | 0.090943995 |
| GO:2000394 | positive regul 1/29  | 7/18723   | 0.01079375  | 0.128113766 | 0.090943995 |
| GO:2001027 | negative regul 1/29  | 7/18723   | 0.01079375  | 0.128113766 | 0.090943995 |
| GO:0001666 | response to h 3/29   | 307/18723 | 0.011638323 | 0.128113766 | 0.090943995 |
| GO:0032526 | response to r 2/29   | 107/18723 | 0.011879789 | 0.128113766 | 0.090943995 |
| GO:0002832 | negative regul 2/29  | 108/18723 | 0.012092399 | 0.128113766 | 0.090943995 |
| GO:0003162 | atrioventricul 1/29  | 8/18723   | 0.012326502 | 0.128113766 | 0.090943995 |
| GO:0032364 | oxygen home 1/29     | 8/18723   | 0.012326502 | 0.128113766 | 0.090943995 |
| GO:0035754 | B cell chemot 1/29   | 8/18723   | 0.012326502 | 0.128113766 | 0.090943995 |
| GO:0043045 | DNA methyla 1/29     | 8/18723   | 0.012326502 | 0.128113766 | 0.090943995 |
| GO:0048149 | behavioral re. 1/29  | 8/18723   | 0.012326502 | 0.128113766 | 0.090943995 |
| GO:0051584 | regulation of 1/29   | 8/18723   | 0.012326502 | 0.128113766 | 0.090943995 |
| GO:0051823 | regulation of 1/29   | 8/18723   | 0.012326502 | 0.128113766 | 0.090943995 |
| GO:0051890 | regulation of 1/29   | 8/18723   | 0.012326502 | 0.128113766 | 0.090943995 |
| GO:0051940 | regulation of 1/29   | 8/18723   | 0.012326502 | 0.128113766 | 0.090943995 |
| GO:0060158 | phospholipas 1/29    | 8/18723   | 0.012326502 | 0.128113766 | 0.090943995 |
| GO:0061909 | autophagosoι 1/29    | 8/18723   | 0.012326502 | 0.128113766 | 0.090943995 |
| GO:0070070 | proton-transp 1/29   | 8/18723   | 0.012326502 | 0.128113766 | 0.090943995 |
| GO:1901388 | regulation of 1/29   | 8/18723   | 0.012326502 | 0.128113766 | 0.090943995 |
| GO:1901538 | changes to DI 1/29   | 8/18723   | 0.012326502 | 0.128113766 | 0.090943995 |
| GO:1904936 | interneuron r 1/29   | 8/18723   | 0.012326502 | 0.128113766 | 0.090943995 |
| GO:0018958 | phenol-conta 2/29    | 110/18723 | 0.012522641 | 0.128113766 | 0.090943995 |
| GO:0006959 | humoral imm 3/29     | 317/18723 | 0.01268542  | 0.128113766 | 0.090943995 |
| GO:0044344 | cellular respo 2/29  | 113/18723 | 0.013180479 | 0.128113766 | 0.090943995 |
| GO:0036293 | response to d 3/29   | 322/18723 | 0.013228727 | 0.128113766 | 0.090943995 |
| GO:0043010 | camera-type 3/29     | 322/18723 | 0.013228727 | 0.128113766 | 0.090943995 |
| GO:0043279 | response to a 2/29   | 115/18723 | 0.013627292 | 0.128113766 | 0.090943995 |
| GO:0002831 | regulation of 3/29   | 327/18723 | 0.013785277 | 0.128113766 | 0.090943995 |
| GO:0033559 | unsaturated f 2/29   | 116/18723 | 0.01385316  | 0.128113766 | 0.090943995 |

|            |                     |           |             |             |             |
|------------|---------------------|-----------|-------------|-------------|-------------|
| GO:0021826 | substrate-ind 1/29  | 9/18723   | 0.013856961 | 0.128113766 | 0.090943995 |
| GO:0021830 | interneuron r 1/29  | 9/18723   | 0.013856961 | 0.128113766 | 0.090943995 |
| GO:0021843 | substrate-ind 1/29  | 9/18723   | 0.013856961 | 0.128113766 | 0.090943995 |
| GO:0031987 | locomotion ir 1/29  | 9/18723   | 0.013856961 | 0.128113766 | 0.090943995 |
| GO:0032906 | transforming 1/29   | 9/18723   | 0.013856961 | 0.128113766 | 0.090943995 |
| GO:0032909 | regulation of 1/29  | 9/18723   | 0.013856961 | 0.128113766 | 0.090943995 |
| GO:0046602 | regulation of 1/29  | 9/18723   | 0.013856961 | 0.128113766 | 0.090943995 |
| GO:0048733 | sebaceous glc 1/29  | 9/18723   | 0.013856961 | 0.128113766 | 0.090943995 |
| GO:0051967 | negative regu 1/29  | 9/18723   | 0.013856961 | 0.128113766 | 0.090943995 |
| GO:0060124 | positive regul 1/29 | 9/18723   | 0.013856961 | 0.128113766 | 0.090943995 |
| GO:0060430 | lung saccule c 1/29 | 9/18723   | 0.013856961 | 0.128113766 | 0.090943995 |
| GO:0060536 | cartilage mor 1/29  | 9/18723   | 0.013856961 | 0.128113766 | 0.090943995 |
| GO:0097267 | omega-hydro 1/29    | 9/18723   | 0.013856961 | 0.128113766 | 0.090943995 |
| GO:1902774 | late endosom 1/29   | 9/18723   | 0.013856961 | 0.128113766 | 0.090943995 |
| GO:0071774 | response to fi 2/29 | 120/18723 | 0.014772912 | 0.128113766 | 0.090943995 |
| GO:0001915 | negative regu 1/29  | 10/18723  | 0.015385129 | 0.128113766 | 0.090943995 |
| GO:0010968 | regulation of 1/29  | 10/18723  | 0.015385129 | 0.128113766 | 0.090943995 |
| GO:0030388 | fructose 1,6-t 1/29 | 10/18723  | 0.015385129 | 0.128113766 | 0.090943995 |
| GO:0035768 | endothelial c 1/29  | 10/18723  | 0.015385129 | 0.128113766 | 0.090943995 |
| GO:0036363 | transforming 1/29   | 10/18723  | 0.015385129 | 0.128113766 | 0.090943995 |
| GO:0042756 | drinking beha 1/29  | 10/18723  | 0.015385129 | 0.128113766 | 0.090943995 |
| GO:0048755 | branching mc 1/29   | 10/18723  | 0.015385129 | 0.128113766 | 0.090943995 |
| GO:0060439 | trachea morp 1/29   | 10/18723  | 0.015385129 | 0.128113766 | 0.090943995 |
| GO:0060947 | cardiac vascu 1/29  | 10/18723  | 0.015385129 | 0.128113766 | 0.090943995 |
| GO:0061140 | lung secretor 1/29  | 10/18723  | 0.015385129 | 0.128113766 | 0.090943995 |
| GO:0072070 | loop of Henle 1/29  | 10/18723  | 0.015385129 | 0.128113766 | 0.090943995 |
| GO:2000288 | positive regul 1/29 | 10/18723  | 0.015385129 | 0.128113766 | 0.090943995 |
| GO:2000544 | regulation of 1/29  | 10/18723  | 0.015385129 | 0.128113766 | 0.090943995 |
| GO:0070482 | response to c 3/29  | 347/18723 | 0.016144848 | 0.128113766 | 0.090943995 |
| GO:0035270 | endocrine sys 2/29  | 127/18723 | 0.016444365 | 0.128113766 | 0.090943995 |
| GO:0002759 | regulation of 1/29  | 11/18723  | 0.016911011 | 0.128113766 | 0.090943995 |
| GO:0014854 | response to ii 1/29 | 11/18723  | 0.016911011 | 0.128113766 | 0.090943995 |
| GO:0021892 | cerebral cort 1/29  | 11/18723  | 0.016911011 | 0.128113766 | 0.090943995 |
| GO:0030432 | peristalsis 1/29    | 11/18723  | 0.016911011 | 0.128113766 | 0.090943995 |
| GO:0033483 | gas homeost 1/29    | 11/18723  | 0.016911011 | 0.128113766 | 0.090943995 |
| GO:0033625 | positive regul 1/29 | 11/18723  | 0.016911011 | 0.128113766 | 0.090943995 |
| GO:0033632 | regulation of 1/29  | 11/18723  | 0.016911011 | 0.128113766 | 0.090943995 |
| GO:0034776 | response to h 1/29  | 11/18723  | 0.016911011 | 0.128113766 | 0.090943995 |
| GO:0035766 | cell chemota 1/29   | 11/18723  | 0.016911011 | 0.128113766 | 0.090943995 |
| GO:0060159 | regulation of 1/29  | 11/18723  | 0.016911011 | 0.128113766 | 0.090943995 |
| GO:0060433 | bronchus dev 1/29   | 11/18723  | 0.016911011 | 0.128113766 | 0.090943995 |
| GO:0072205 | metanephric 1/29    | 11/18723  | 0.016911011 | 0.128113766 | 0.090943995 |
| GO:1904847 | regulation of 1/29  | 11/18723  | 0.016911011 | 0.128113766 | 0.090943995 |
| GO:2000392 | regulation of 1/29  | 11/18723  | 0.016911011 | 0.128113766 | 0.090943995 |
| GO:0001976 | nervous syste 1/29  | 12/18723  | 0.01843461  | 0.128113766 | 0.090943995 |
| GO:0031223 | auditory beh 1/29   | 12/18723  | 0.01843461  | 0.128113766 | 0.090943995 |
| GO:0032536 | regulation of 1/29  | 12/18723  | 0.01843461  | 0.128113766 | 0.090943995 |
| GO:0032908 | regulation of 1/29  | 12/18723  | 0.01843461  | 0.128113766 | 0.090943995 |
| GO:0051583 | dopamine up 1/29    | 12/18723  | 0.01843461  | 0.128113766 | 0.090943995 |
| GO:0051934 | catecholamin 1/29   | 12/18723  | 0.01843461  | 0.128113766 | 0.090943995 |

|            |                  |      |           |             |             |             |
|------------|------------------|------|-----------|-------------|-------------|-------------|
| GO:0060123 | regulation of    | 1/29 | 12/18723  | 0.01843461  | 0.128113766 | 0.090943995 |
| GO:0060134 | prepulse inhib   | 1/29 | 12/18723  | 0.01843461  | 0.128113766 | 0.090943995 |
| GO:0060394 | negative regu    | 1/29 | 12/18723  | 0.01843461  | 0.128113766 | 0.090943995 |
| GO:0071635 | negative regu    | 1/29 | 12/18723  | 0.01843461  | 0.128113766 | 0.090943995 |
| GO:0001701 | in utero embri   | 3/29 | 367/18723 | 0.018719682 | 0.128113766 | 0.090943995 |
| GO:0045471 | response to e    | 2/29 | 137/18723 | 0.01896573  | 0.128113766 | 0.090943995 |
| GO:0001654 | eye developn     | 3/29 | 371/18723 | 0.019260657 | 0.128113766 | 0.090943995 |
| GO:0150063 | visual system    | 3/29 | 375/18723 | 0.01981033  | 0.128113766 | 0.090943995 |
| GO:0006000 | fructose met     | 1/29 | 13/18723  | 0.019955929 | 0.128113766 | 0.090943995 |
| GO:0021984 | adenohypoph      | 1/29 | 13/18723  | 0.019955929 | 0.128113766 | 0.090943995 |
| GO:0032905 | transforming     | 1/29 | 13/18723  | 0.019955929 | 0.128113766 | 0.090943995 |
| GO:0036302 | atrioventricul   | 1/29 | 13/18723  | 0.019955929 | 0.128113766 | 0.090943995 |
| GO:0051481 | negative regu    | 1/29 | 13/18723  | 0.019955929 | 0.128113766 | 0.090943995 |
| GO:0051988 | regulation of    | 1/29 | 13/18723  | 0.019955929 | 0.128113766 | 0.090943995 |
| GO:0060213 | positive regul   | 1/29 | 13/18723  | 0.019955929 | 0.128113766 | 0.090943995 |
| GO:0097154 | GABAergic ne     | 1/29 | 13/18723  | 0.019955929 | 0.128113766 | 0.090943995 |
| GO:0030900 | forebrain dev    | 3/29 | 379/18723 | 0.02036871  | 0.128113766 | 0.090943995 |
| GO:0048880 | sensory syste    | 3/29 | 381/18723 | 0.020651169 | 0.128113766 | 0.090943995 |
| GO:0001890 | placenta dev     | 2/29 | 144/18723 | 0.020821778 | 0.128113766 | 0.090943995 |
| GO:0061351 | neural precu     | 2/29 | 145/18723 | 0.021092932 | 0.128113766 | 0.090943995 |
| GO:0007043 | cell-cell juncti | 2/29 | 146/18723 | 0.021365572 | 0.128113766 | 0.090943995 |
| GO:0001711 | endodermal c     | 1/29 | 14/18723  | 0.021474971 | 0.128113766 | 0.090943995 |
| GO:0002467 | germinal cent    | 1/29 | 14/18723  | 0.021474971 | 0.128113766 | 0.090943995 |
| GO:0007100 | mitotic centr    | 1/29 | 14/18723  | 0.021474971 | 0.128113766 | 0.090943995 |
| GO:0007638 | mechanosens      | 1/29 | 14/18723  | 0.021474971 | 0.128113766 | 0.090943995 |
| GO:0010457 | centriole-cen    | 1/29 | 14/18723  | 0.021474971 | 0.128113766 | 0.090943995 |
| GO:0031115 | negative regu    | 1/29 | 14/18723  | 0.021474971 | 0.128113766 | 0.090943995 |
| GO:0033604 | negative regu    | 1/29 | 14/18723  | 0.021474971 | 0.128113766 | 0.090943995 |
| GO:0035810 | positive regul   | 1/29 | 14/18723  | 0.021474971 | 0.128113766 | 0.090943995 |
| GO:0035815 | positive regul   | 1/29 | 14/18723  | 0.021474971 | 0.128113766 | 0.090943995 |
| GO:0048148 | behavioral re    | 1/29 | 14/18723  | 0.021474971 | 0.128113766 | 0.090943995 |
| GO:0055057 | neuroblast di    | 1/29 | 14/18723  | 0.021474971 | 0.128113766 | 0.090943995 |
| GO:0070307 | lens fiber cell  | 1/29 | 14/18723  | 0.021474971 | 0.128113766 | 0.090943995 |
| GO:0071456 | cellular respo   | 2/29 | 151/18723 | 0.022750894 | 0.128113766 | 0.090943995 |
| GO:0006570 | tyrosine met     | 1/29 | 15/18723  | 0.02299174  | 0.128113766 | 0.090943995 |
| GO:0010763 | positive regul   | 1/29 | 15/18723  | 0.02299174  | 0.128113766 | 0.090943995 |
| GO:0010820 | positive regul   | 1/29 | 15/18723  | 0.02299174  | 0.128113766 | 0.090943995 |
| GO:0030252 | growth horm      | 1/29 | 15/18723  | 0.02299174  | 0.128113766 | 0.090943995 |
| GO:0042754 | negative regu    | 1/29 | 15/18723  | 0.02299174  | 0.128113766 | 0.090943995 |
| GO:0051299 | centrosome s     | 1/29 | 15/18723  | 0.02299174  | 0.128113766 | 0.090943995 |
| GO:0060211 | regulation of    | 1/29 | 15/18723  | 0.02299174  | 0.128113766 | 0.090943995 |
| GO:0070071 | proton-transp    | 1/29 | 15/18723  | 0.02299174  | 0.128113766 | 0.090943995 |
| GO:0072044 | collecting duc   | 1/29 | 15/18723  | 0.02299174  | 0.128113766 | 0.090943995 |
| GO:0099170 | postsynaptic     | 1/29 | 15/18723  | 0.02299174  | 0.128113766 | 0.090943995 |
| GO:1900029 | positive regul   | 1/29 | 15/18723  | 0.02299174  | 0.128113766 | 0.090943995 |
| GO:1900153 | positive regul   | 1/29 | 15/18723  | 0.02299174  | 0.128113766 | 0.090943995 |
| GO:1904424 | regulation of    | 1/29 | 15/18723  | 0.02299174  | 0.128113766 | 0.090943995 |
| GO:0006349 | regulation of    | 1/29 | 16/18723  | 0.024506238 | 0.131673636 | 0.093471036 |
| GO:0010819 | regulation of    | 1/29 | 16/18723  | 0.024506238 | 0.131673636 | 0.093471036 |
| GO:0033631 | cell-cell adhe   | 1/29 | 16/18723  | 0.024506238 | 0.131673636 | 0.093471036 |

|            |                |      |           |             |             |             |
|------------|----------------|------|-----------|-------------|-------------|-------------|
| GO:0071361 | cellular respo | 1/29 | 16/18723  | 0.024506238 | 0.131673636 | 0.093471036 |
| GO:0097284 | hepatocyte a   | 1/29 | 16/18723  | 0.024506238 | 0.131673636 | 0.093471036 |
| GO:0036294 | cellular respo | 2/29 | 161/18723 | 0.025630201 | 0.131673636 | 0.093471036 |
| GO:0002031 | G protein-co   | 1/29 | 17/18723  | 0.02601847  | 0.131673636 | 0.093471036 |
| GO:0007625 | grooming beh   | 1/29 | 17/18723  | 0.02601847  | 0.131673636 | 0.093471036 |
| GO:0021756 | striatum dev   | 1/29 | 17/18723  | 0.02601847  | 0.131673636 | 0.093471036 |
| GO:0030903 | notochord de   | 1/29 | 17/18723  | 0.02601847  | 0.131673636 | 0.093471036 |
| GO:0033623 | regulation of  | 1/29 | 17/18723  | 0.02601847  | 0.131673636 | 0.093471036 |
| GO:0048521 | negative regu  | 1/29 | 17/18723  | 0.02601847  | 0.131673636 | 0.093471036 |
| GO:0051580 | regulation of  | 1/29 | 17/18723  | 0.02601847  | 0.131673636 | 0.093471036 |
| GO:0060033 | anatomical st  | 1/29 | 17/18723  | 0.02601847  | 0.131673636 | 0.093471036 |
| GO:0071371 | cellular respo | 1/29 | 17/18723  | 0.02601847  | 0.131673636 | 0.093471036 |
| GO:0072673 | lamellipodiun  | 1/29 | 17/18723  | 0.02601847  | 0.131673636 | 0.093471036 |
| GO:0090494 | dopamine up    | 1/29 | 17/18723  | 0.02601847  | 0.131673636 | 0.093471036 |
| GO:1904355 | positive regul | 1/29 | 17/18723  | 0.02601847  | 0.131673636 | 0.093471036 |
| GO:0032102 | negative regu  | 3/29 | 420/18723 | 0.026595686 | 0.131673636 | 0.093471036 |
| GO:0043112 | receptor met   | 2/29 | 166/18723 | 0.027122986 | 0.131673636 | 0.093471036 |
| GO:0048608 | reproductive   | 3/29 | 424/18723 | 0.027252388 | 0.131673636 | 0.093471036 |
| GO:0002223 | stimulatory C  | 1/29 | 18/18723  | 0.027528438 | 0.131673636 | 0.093471036 |
| GO:0002544 | chronic inflan | 1/29 | 18/18723  | 0.027528438 | 0.131673636 | 0.093471036 |
| GO:0033189 | response to v  | 1/29 | 18/18723  | 0.027528438 | 0.131673636 | 0.093471036 |
| GO:0045187 | regulation of  | 1/29 | 18/18723  | 0.027528438 | 0.131673636 | 0.093471036 |
| GO:0045953 | negative regu  | 1/29 | 18/18723  | 0.027528438 | 0.131673636 | 0.093471036 |
| GO:0060438 | trachea devel  | 1/29 | 18/18723  | 0.027528438 | 0.131673636 | 0.093471036 |
| GO:0072234 | metanephric    | 1/29 | 18/18723  | 0.027528438 | 0.131673636 | 0.093471036 |
| GO:0090493 | catecholamin   | 1/29 | 18/18723  | 0.027528438 | 0.131673636 | 0.093471036 |
| GO:1900151 | regulation of  | 1/29 | 18/18723  | 0.027528438 | 0.131673636 | 0.093471036 |
| GO:1990840 | response to k  | 1/29 | 18/18723  | 0.027528438 | 0.131673636 | 0.093471036 |
| GO:1990858 | cellular respo | 1/29 | 18/18723  | 0.027528438 | 0.131673636 | 0.093471036 |
| GO:0061458 | reproductive   | 3/29 | 427/18723 | 0.027750652 | 0.132151784 | 0.093810458 |
| GO:0043254 | regulation of  | 3/29 | 428/18723 | 0.027917833 | 0.132364812 | 0.093961681 |
| GO:0002716 | negative regu  | 1/29 | 19/18723  | 0.029036146 | 0.134137068 | 0.09521975  |
| GO:0010002 | cardioblast di | 1/29 | 19/18723  | 0.029036146 | 0.134137068 | 0.09521975  |
| GO:0014067 | negative regu  | 1/29 | 19/18723  | 0.029036146 | 0.134137068 | 0.09521975  |
| GO:0045780 | positive regul | 1/29 | 19/18723  | 0.029036146 | 0.134137068 | 0.09521975  |
| GO:0140131 | positive regul | 1/29 | 19/18723  | 0.029036146 | 0.134137068 | 0.09521975  |
| GO:2000738 | positive regul | 1/29 | 19/18723  | 0.029036146 | 0.134137068 | 0.09521975  |
| GO:0048732 | gland develop  | 3/29 | 436/18723 | 0.029274934 | 0.134664697 | 0.095594298 |
| GO:0001659 | temperature    | 2/29 | 174/18723 | 0.029583232 | 0.134934488 | 0.095785814 |
| GO:0048639 | positive regul | 2/29 | 174/18723 | 0.029583232 | 0.134934488 | 0.095785814 |
| GO:0030324 | lung developr  | 2/29 | 177/18723 | 0.030528193 | 0.135309288 | 0.096051873 |
| GO:0051302 | regulation of  | 2/29 | 177/18723 | 0.030528193 | 0.135309288 | 0.096051873 |
| GO:0071453 | cellular respo | 2/29 | 177/18723 | 0.030528193 | 0.135309288 | 0.096051873 |
| GO:0006346 | DNA methyla    | 1/29 | 20/18723  | 0.030541597 | 0.135309288 | 0.096051873 |
| GO:0007194 | negative regu  | 1/29 | 20/18723  | 0.030541597 | 0.135309288 | 0.096051873 |
| GO:0043046 | DNA methyla    | 1/29 | 20/18723  | 0.030541597 | 0.135309288 | 0.096051873 |
| GO:1901386 | negative regu  | 1/29 | 20/18723  | 0.030541597 | 0.135309288 | 0.096051873 |
| GO:0030323 | respiratory tu | 2/29 | 181/18723 | 0.031806799 | 0.135781502 | 0.096387083 |
| GO:0023019 | signal transdu | 1/29 | 21/18723  | 0.032044794 | 0.135781502 | 0.096387083 |
| GO:0033630 | positive regul | 1/29 | 21/18723  | 0.032044794 | 0.135781502 | 0.096387083 |

|            |                 |      |           |             |             |             |
|------------|-----------------|------|-----------|-------------|-------------|-------------|
| GO:0035813 | regulation of   | 1/29 | 21/18723  | 0.032044794 | 0.135781502 | 0.096387083 |
| GO:0050802 | circadian slee  | 1/29 | 21/18723  | 0.032044794 | 0.135781502 | 0.096387083 |
| GO:0072170 | metanephric     | 1/29 | 21/18723  | 0.032044794 | 0.135781502 | 0.096387083 |
| GO:0072243 | metanephric     | 1/29 | 21/18723  | 0.032044794 | 0.135781502 | 0.096387083 |
| GO:0150105 | protein locali  | 1/29 | 21/18723  | 0.032044794 | 0.135781502 | 0.096387083 |
| GO:1905209 | positive regul  | 1/29 | 21/18723  | 0.032044794 | 0.135781502 | 0.096387083 |
| GO:2000291 | regulation of   | 1/29 | 21/18723  | 0.032044794 | 0.135781502 | 0.096387083 |
| GO:0009314 | response to r   | 3/29 | 456/18723 | 0.032820298 | 0.135781502 | 0.096387083 |
| GO:0051896 | regulation of   | 2/29 | 185/18723 | 0.033106459 | 0.135781502 | 0.096387083 |
| GO:0002029 | desensitizati   | 1/29 | 22/18723  | 0.03354574  | 0.135781502 | 0.096387083 |
| GO:0002220 | innate immur    | 1/29 | 22/18723  | 0.03354574  | 0.135781502 | 0.096387083 |
| GO:0014821 | phasic smoot    | 1/29 | 22/18723  | 0.03354574  | 0.135781502 | 0.096387083 |
| GO:0022401 | negative adaç   | 1/29 | 22/18723  | 0.03354574  | 0.135781502 | 0.096387083 |
| GO:0035809 | regulation of   | 1/29 | 22/18723  | 0.03354574  | 0.135781502 | 0.096387083 |
| GO:0042749 | regulation of   | 1/29 | 22/18723  | 0.03354574  | 0.135781502 | 0.096387083 |
| GO:0048169 | regulation of   | 1/29 | 22/18723  | 0.03354574  | 0.135781502 | 0.096387083 |
| GO:0060713 | labyrinthine l  | 1/29 | 22/18723  | 0.03354574  | 0.135781502 | 0.096387083 |
| GO:0002758 | innate immur    | 1/29 | 23/18723  | 0.035044439 | 0.135781502 | 0.096387083 |
| GO:0016338 | calcium-indeç   | 1/29 | 23/18723  | 0.035044439 | 0.135781502 | 0.096387083 |
| GO:0021544 | subpallium de   | 1/29 | 23/18723  | 0.035044439 | 0.135781502 | 0.096387083 |
| GO:0021871 | forebrain regi  | 1/29 | 23/18723  | 0.035044439 | 0.135781502 | 0.096387083 |
| GO:0021895 | cerebral corte  | 1/29 | 23/18723  | 0.035044439 | 0.135781502 | 0.096387083 |
| GO:0023058 | adaptation of   | 1/29 | 23/18723  | 0.035044439 | 0.135781502 | 0.096387083 |
| GO:0031280 | negative regu   | 1/29 | 23/18723  | 0.035044439 | 0.135781502 | 0.096387083 |
| GO:0035812 | renal sodium    | 1/29 | 23/18723  | 0.035044439 | 0.135781502 | 0.096387083 |
| GO:0042438 | melanin biosy   | 1/29 | 23/18723  | 0.035044439 | 0.135781502 | 0.096387083 |
| GO:0051590 | positive regul  | 1/29 | 23/18723  | 0.035044439 | 0.135781502 | 0.096387083 |
| GO:0060487 | lung epithelia  | 1/29 | 23/18723  | 0.035044439 | 0.135781502 | 0.096387083 |
| GO:0060575 | intestinal epit | 1/29 | 23/18723  | 0.035044439 | 0.135781502 | 0.096387083 |
| GO:0071514 | genetic impri   | 1/29 | 23/18723  | 0.035044439 | 0.135781502 | 0.096387083 |
| GO:0071636 | positive regul  | 1/29 | 23/18723  | 0.035044439 | 0.135781502 | 0.096387083 |
| GO:1900273 | positive regul  | 1/29 | 23/18723  | 0.035044439 | 0.135781502 | 0.096387083 |
| GO:0050777 | negative regu   | 2/29 | 194/18723 | 0.036106182 | 0.136680647 | 0.097025359 |
| GO:0001911 | negative regu   | 1/29 | 24/18723  | 0.036540895 | 0.136680647 | 0.097025359 |
| GO:0003148 | outflow tract   | 1/29 | 24/18723  | 0.036540895 | 0.136680647 | 0.097025359 |
| GO:0006582 | melanin metç    | 1/29 | 24/18723  | 0.036540895 | 0.136680647 | 0.097025359 |
| GO:0010288 | response to lç  | 1/29 | 24/18723  | 0.036540895 | 0.136680647 | 0.097025359 |
| GO:0022410 | circadian slee  | 1/29 | 24/18723  | 0.036540895 | 0.136680647 | 0.097025359 |
| GO:0044062 | regulation of   | 1/29 | 24/18723  | 0.036540895 | 0.136680647 | 0.097025359 |
| GO:0060479 | lung cell diffe | 1/29 | 24/18723  | 0.036540895 | 0.136680647 | 0.097025359 |
| GO:2000209 | regulation of   | 1/29 | 24/18723  | 0.036540895 | 0.136680647 | 0.097025359 |
| GO:2001026 | regulation of   | 1/29 | 24/18723  | 0.036540895 | 0.136680647 | 0.097025359 |
| GO:0001763 | morphogeneç     | 2/29 | 196/18723 | 0.036786735 | 0.137125726 | 0.097341306 |
| GO:0001964 | startle respor  | 1/29 | 25/18723  | 0.038035109 | 0.137972996 | 0.097942757 |
| GO:0010996 | response to a   | 1/29 | 25/18723  | 0.038035109 | 0.137972996 | 0.097942757 |
| GO:0021846 | cell proliferat | 1/29 | 25/18723  | 0.038035109 | 0.137972996 | 0.097942757 |
| GO:0033622 | integrin activi | 1/29 | 25/18723  | 0.038035109 | 0.137972996 | 0.097942757 |
| GO:0044550 | secondary mç    | 1/29 | 25/18723  | 0.038035109 | 0.137972996 | 0.097942757 |
| GO:0051450 | myoblast pro    | 1/29 | 25/18723  | 0.038035109 | 0.137972996 | 0.097942757 |
| GO:0072207 | metanephric     | 1/29 | 25/18723  | 0.038035109 | 0.137972996 | 0.097942757 |

|            |                  |      |           |             |             |             |
|------------|------------------|------|-----------|-------------|-------------|-------------|
| GO:1901623 | regulation of    | 1/29 | 25/18723  | 0.038035109 | 0.137972996 | 0.097942757 |
| GO:0045216 | cell-cell juncti | 2/29 | 200/18723 | 0.038162793 | 0.137973174 | 0.097942883 |
| GO:0060541 | respiratory sy   | 2/29 | 203/18723 | 0.039207781 | 0.13828084  | 0.098161286 |
| GO:0001963 | synaptic tran    | 1/29 | 26/18723  | 0.039527086 | 0.13828084  | 0.098161286 |
| GO:0002092 | positive regul   | 1/29 | 26/18723  | 0.039527086 | 0.13828084  | 0.098161286 |
| GO:0002710 | negative regu    | 1/29 | 26/18723  | 0.039527086 | 0.13828084  | 0.098161286 |
| GO:0045745 | positive regul   | 1/29 | 26/18723  | 0.039527086 | 0.13828084  | 0.098161286 |
| GO:0045954 | positive regul   | 1/29 | 26/18723  | 0.039527086 | 0.13828084  | 0.098161286 |
| GO:0051350 | negative regu    | 1/29 | 26/18723  | 0.039527086 | 0.13828084  | 0.098161286 |
| GO:0060669 | embryonic pl     | 1/29 | 26/18723  | 0.039527086 | 0.13828084  | 0.098161286 |
| GO:0071880 | adenylate cyc    | 1/29 | 26/18723  | 0.039527086 | 0.13828084  | 0.098161286 |
| GO:1904353 | regulation of    | 1/29 | 26/18723  | 0.039527086 | 0.13828084  | 0.098161286 |
| GO:0001958 | endochondra      | 1/29 | 27/18723  | 0.041016828 | 0.140313896 | 0.09960449  |
| GO:0007628 | adult walking    | 1/29 | 27/18723  | 0.041016828 | 0.140313896 | 0.09960449  |
| GO:0032781 | positive regul   | 1/29 | 27/18723  | 0.041016828 | 0.140313896 | 0.09960449  |
| GO:0034698 | response to g    | 1/29 | 27/18723  | 0.041016828 | 0.140313896 | 0.09960449  |
| GO:0036075 | replacement      | 1/29 | 27/18723  | 0.041016828 | 0.140313896 | 0.09960449  |
| GO:0042745 | circadian slee   | 1/29 | 27/18723  | 0.041016828 | 0.140313896 | 0.09960449  |
| GO:0051953 | negative regu    | 1/29 | 27/18723  | 0.041016828 | 0.140313896 | 0.09960449  |
| GO:0043491 | protein kinas    | 2/29 | 211/18723 | 0.042047707 | 0.143137667 | 0.101608997 |
| GO:0010818 | T cell chemot    | 1/29 | 28/18723  | 0.04250434  | 0.143137667 | 0.101608997 |
| GO:0031342 | negative regu    | 1/29 | 28/18723  | 0.04250434  | 0.143137667 | 0.101608997 |
| GO:0032801 | receptor cata    | 1/29 | 28/18723  | 0.04250434  | 0.143137667 | 0.101608997 |
| GO:0090659 | walking beha     | 1/29 | 28/18723  | 0.04250434  | 0.143137667 | 0.101608997 |
| GO:0000289 | nuclear-trans    | 1/29 | 29/18723  | 0.043989623 | 0.145867431 | 0.103546772 |
| GO:0003309 | type B pancre    | 1/29 | 29/18723  | 0.043989623 | 0.145867431 | 0.103546772 |
| GO:0006734 | NADH metab       | 1/29 | 29/18723  | 0.043989623 | 0.145867431 | 0.103546772 |
| GO:0040018 | positive regul   | 1/29 | 29/18723  | 0.043989623 | 0.145867431 | 0.103546772 |
| GO:2000406 | positive regul   | 1/29 | 29/18723  | 0.043989623 | 0.145867431 | 0.103546772 |
| GO:0007163 | establishmen     | 2/29 | 218/18723 | 0.044594879 | 0.146734236 | 0.10416209  |
| GO:0045088 | regulation of    | 2/29 | 218/18723 | 0.044594879 | 0.146734236 | 0.10416209  |
| GO:0003299 | muscle hyper     | 1/29 | 30/18723  | 0.045472682 | 0.146734236 | 0.10416209  |
| GO:0009072 | aromatic ami     | 1/29 | 30/18723  | 0.045472682 | 0.146734236 | 0.10416209  |
| GO:0014887 | cardiac muscl    | 1/29 | 30/18723  | 0.045472682 | 0.146734236 | 0.10416209  |
| GO:0014898 | cardiac muscl    | 1/29 | 30/18723  | 0.045472682 | 0.146734236 | 0.10416209  |
| GO:0019674 | NAD metabol      | 1/29 | 30/18723  | 0.045472682 | 0.146734236 | 0.10416209  |
| GO:0031365 | N-terminal pr    | 1/29 | 30/18723  | 0.045472682 | 0.146734236 | 0.10416209  |
| GO:0034508 | centromere c     | 1/29 | 30/18723  | 0.045472682 | 0.146734236 | 0.10416209  |
| GO:0002717 | positive regul   | 1/29 | 31/18723  | 0.046953519 | 0.148846786 | 0.105661724 |
| GO:0050482 | arachidonic a    | 1/29 | 31/18723  | 0.046953519 | 0.148846786 | 0.105661724 |
| GO:0060045 | positive regul   | 1/29 | 31/18723  | 0.046953519 | 0.148846786 | 0.105661724 |
| GO:0060795 | cell fate comr   | 1/29 | 31/18723  | 0.046953519 | 0.148846786 | 0.105661724 |
| GO:1900027 | regulation of    | 1/29 | 31/18723  | 0.046953519 | 0.148846786 | 0.105661724 |
| GO:1903963 | arachidonate     | 1/29 | 31/18723  | 0.046953519 | 0.148846786 | 0.105661724 |
| GO:0050769 | positive regul   | 2/29 | 225/18723 | 0.047198624 | 0.149186294 | 0.10590273  |
| GO:0003338 | metanephros      | 1/29 | 32/18723  | 0.048432138 | 0.150014732 | 0.106490812 |
| GO:0010039 | response to ii   | 1/29 | 32/18723  | 0.048432138 | 0.150014732 | 0.106490812 |
| GO:0030431 | sleep            | 1/29 | 32/18723  | 0.048432138 | 0.150014732 | 0.106490812 |
| GO:0035767 | endothelial c    | 1/29 | 32/18723  | 0.048432138 | 0.150014732 | 0.106490812 |
| GO:0035883 | enteroendocr     | 1/29 | 32/18723  | 0.048432138 | 0.150014732 | 0.106490812 |

|            |                 |      |           |             |             |             |
|------------|-----------------|------|-----------|-------------|-------------|-------------|
| GO:0045761 | regulation of   | 1/29 | 32/18723  | 0.048432138 | 0.150014732 | 0.106490812 |
| GO:0071875 | adrenergic re   | 1/29 | 32/18723  | 0.048432138 | 0.150014732 | 0.106490812 |
| GO:0001975 | response to a   | 1/29 | 33/18723  | 0.049908542 | 0.153270268 | 0.108801816 |
| GO:0018345 | protein palmi   | 1/29 | 33/18723  | 0.049908542 | 0.153270268 | 0.108801816 |
| GO:0032228 | regulation of   | 1/29 | 33/18723  | 0.049908542 | 0.153270268 | 0.108801816 |
| GO:0007160 | cell-matrix ad  | 2/29 | 233/18723 | 0.050241778 | 0.153856549 | 0.109217999 |
| GO:0007616 | long-term me    | 1/29 | 34/18723  | 0.051382734 | 0.154290933 | 0.109526355 |
| GO:0014072 | response to i   | 1/29 | 34/18723  | 0.051382734 | 0.154290933 | 0.109526355 |
| GO:0032212 | positive regul  | 1/29 | 34/18723  | 0.051382734 | 0.154290933 | 0.109526355 |
| GO:0043276 | anoikis         | 1/29 | 34/18723  | 0.051382734 | 0.154290933 | 0.109526355 |
| GO:0043278 | response to n   | 1/29 | 34/18723  | 0.051382734 | 0.154290933 | 0.109526355 |
| GO:0051482 | positive regul  | 1/29 | 34/18723  | 0.051382734 | 0.154290933 | 0.109526355 |
| GO:0051973 | positive regul  | 1/29 | 34/18723  | 0.051382734 | 0.154290933 | 0.109526355 |
| GO:0031334 | positive regul  | 2/29 | 237/18723 | 0.051789711 | 0.15508221  | 0.110088058 |
| GO:0007020 | microtubule r   | 1/29 | 35/18723  | 0.052854718 | 0.155683788 | 0.110515099 |
| GO:0008608 | attachment o    | 1/29 | 35/18723  | 0.052854718 | 0.155683788 | 0.110515099 |
| GO:0098801 | regulation of   | 1/29 | 35/18723  | 0.052854718 | 0.155683788 | 0.110515099 |
| GO:0098810 | neurotransmi    | 1/29 | 35/18723  | 0.052854718 | 0.155683788 | 0.110515099 |
| GO:1905207 | regulation of   | 1/29 | 35/18723  | 0.052854718 | 0.155683788 | 0.110515099 |
| GO:2000403 | positive regul  | 1/29 | 35/18723  | 0.052854718 | 0.155683788 | 0.110515099 |
| GO:0010762 | regulation of   | 1/29 | 36/18723  | 0.054324496 | 0.158287817 | 0.112363619 |
| GO:0014046 | dopamine sec    | 1/29 | 36/18723  | 0.054324496 | 0.158287817 | 0.112363619 |
| GO:0014059 | regulation of   | 1/29 | 36/18723  | 0.054324496 | 0.158287817 | 0.112363619 |
| GO:0070306 | lens fiber cell | 1/29 | 36/18723  | 0.054324496 | 0.158287817 | 0.112363619 |
| GO:0003161 | cardiac cond    | 1/29 | 37/18723  | 0.055792072 | 0.160402207 | 0.113864559 |
| GO:0042178 | xenobiotic ca   | 1/29 | 37/18723  | 0.055792072 | 0.160402207 | 0.113864559 |
| GO:0051954 | positive regul  | 1/29 | 37/18723  | 0.055792072 | 0.160402207 | 0.113864559 |
| GO:1902745 | positive regul  | 1/29 | 37/18723  | 0.055792072 | 0.160402207 | 0.113864559 |
| GO:1904358 | positive regul  | 1/29 | 37/18723  | 0.055792072 | 0.160402207 | 0.113864559 |
| GO:0035886 | vascular asso   | 1/29 | 38/18723  | 0.057257449 | 0.163744185 | 0.116236926 |
| GO:0046676 | negative regu   | 1/29 | 38/18723  | 0.057257449 | 0.163744185 | 0.116236926 |
| GO:0097305 | response to a   | 2/29 | 253/18723 | 0.058151169 | 0.165736294 | 0.117651062 |
| GO:0001914 | regulation of   | 1/29 | 39/18723  | 0.05872063  | 0.165736294 | 0.117651062 |
| GO:0016233 | telomere cap    | 1/29 | 39/18723  | 0.05872063  | 0.165736294 | 0.117651062 |
| GO:0031507 | heterochrom     | 1/29 | 39/18723  | 0.05872063  | 0.165736294 | 0.117651062 |
| GO:0042417 | dopamine me     | 1/29 | 39/18723  | 0.05872063  | 0.165736294 | 0.117651062 |
| GO:0043547 | positive regul  | 2/29 | 255/18723 | 0.058964924 | 0.165992404 | 0.117832867 |
| GO:0031111 | negative regu   | 1/29 | 40/18723  | 0.060181618 | 0.167702921 | 0.11904711  |
| GO:1901020 | negative regu   | 1/29 | 40/18723  | 0.060181618 | 0.167702921 | 0.11904711  |
| GO:0031348 | negative regu   | 2/29 | 258/18723 | 0.060193093 | 0.167702921 | 0.11904711  |
| GO:0045165 | cell fate com   | 2/29 | 258/18723 | 0.060193093 | 0.167702921 | 0.11904711  |
| GO:0045927 | positive regul  | 2/29 | 259/18723 | 0.060604476 | 0.16841501  | 0.119552599 |
| GO:0048286 | lung alveolus   | 1/29 | 41/18723  | 0.061640416 | 0.169120025 | 0.120053068 |
| GO:0055023 | positive regul  | 1/29 | 41/18723  | 0.061640416 | 0.169120025 | 0.120053068 |
| GO:0071634 | regulation of   | 1/29 | 41/18723  | 0.061640416 | 0.169120025 | 0.120053068 |
| GO:1900026 | positive regul  | 1/29 | 41/18723  | 0.061640416 | 0.169120025 | 0.120053068 |
| GO:1901385 | regulation of   | 1/29 | 41/18723  | 0.061640416 | 0.169120025 | 0.120053068 |
| GO:0009636 | response to t   | 2/29 | 262/18723 | 0.061844555 | 0.169250542 | 0.120145718 |
| GO:0007212 | dopamine rec    | 1/29 | 42/18723  | 0.063097028 | 0.171376602 | 0.121654942 |
| GO:0032467 | positive regul  | 1/29 | 42/18723  | 0.063097028 | 0.171376602 | 0.121654942 |



|            |                |      |           |             |             |             |
|------------|----------------|------|-----------|-------------|-------------|-------------|
| GO:2000404 | regulation of  | 1/29 | 42/18723  | 0.063097028 | 0.171376602 | 0.121654942 |
| GO:0001504 | neurotransmi   | 1/29 | 43/18723  | 0.064551457 | 0.172296606 | 0.122308024 |
| GO:0001709 | cell fate dete | 1/29 | 43/18723  | 0.064551457 | 0.172296606 | 0.122308024 |
| GO:0021983 | pituitary glan | 1/29 | 43/18723  | 0.064551457 | 0.172296606 | 0.122308024 |
| GO:0045776 | negative regu  | 1/29 | 43/18723  | 0.064551457 | 0.172296606 | 0.122308024 |
| GO:0046717 | acid secretior | 1/29 | 43/18723  | 0.064551457 | 0.172296606 | 0.122308024 |
| GO:0071604 | transforming   | 1/29 | 43/18723  | 0.064551457 | 0.172296606 | 0.122308024 |
| GO:0090278 | negative regu  | 1/29 | 43/18723  | 0.064551457 | 0.172296606 | 0.122308024 |
| GO:0002792 | negative regu  | 1/29 | 44/18723  | 0.066003706 | 0.172440985 | 0.122410515 |
| GO:0008542 | visual learnin | 1/29 | 44/18723  | 0.066003706 | 0.172440985 | 0.122410515 |
| GO:0032007 | negative regu  | 1/29 | 44/18723  | 0.066003706 | 0.172440985 | 0.122410515 |
| GO:0042269 | regulation of  | 1/29 | 44/18723  | 0.066003706 | 0.172440985 | 0.122410515 |
| GO:0045124 | regulation of  | 1/29 | 44/18723  | 0.066003706 | 0.172440985 | 0.122410515 |
| GO:0048066 | development    | 1/29 | 44/18723  | 0.066003706 | 0.172440985 | 0.122410515 |
| GO:0060711 | labyrinthine l | 1/29 | 44/18723  | 0.066003706 | 0.172440985 | 0.122410515 |
| GO:0097178 | ruffle assemb  | 1/29 | 44/18723  | 0.066003706 | 0.172440985 | 0.122410515 |
| GO:0051962 | positive regul | 2/29 | 272/18723 | 0.066041228 | 0.172440985 | 0.122410515 |
| GO:0032309 | icosanoid sec  | 1/29 | 45/18723  | 0.067453778 | 0.174443861 | 0.123832294 |
| GO:0035987 | endodermal c   | 1/29 | 45/18723  | 0.067453778 | 0.174443861 | 0.123832294 |
| GO:0046189 | phenol-conta   | 1/29 | 45/18723  | 0.067453778 | 0.174443861 | 0.123832294 |
| GO:0060421 | positive regul | 1/29 | 45/18723  | 0.067453778 | 0.174443861 | 0.123832294 |
| GO:0007548 | sex differenti | 2/29 | 276/18723 | 0.067746476 | 0.174782674 | 0.124072807 |
| GO:0031018 | endocrine pa   | 1/29 | 46/18723  | 0.068901676 | 0.175253439 | 0.124406989 |
| GO:0035094 | response to n  | 1/29 | 46/18723  | 0.068901676 | 0.175253439 | 0.124406989 |
| GO:0043462 | regulation of  | 1/29 | 46/18723  | 0.068901676 | 0.175253439 | 0.124406989 |
| GO:0060976 | coronary vasc  | 1/29 | 46/18723  | 0.068901676 | 0.175253439 | 0.124406989 |
| GO:0070828 | heterochrom    | 1/29 | 46/18723  | 0.068901676 | 0.175253439 | 0.124406989 |
| GO:1900271 | regulation of  | 1/29 | 46/18723  | 0.068901676 | 0.175253439 | 0.124406989 |
| GO:0010761 | fibroblast mi  | 1/29 | 47/18723  | 0.070347403 | 0.177262338 | 0.125833044 |
| GO:0048512 | circadian beh  | 1/29 | 47/18723  | 0.070347403 | 0.177262338 | 0.125833044 |
| GO:0051972 | regulation of  | 1/29 | 47/18723  | 0.070347403 | 0.177262338 | 0.125833044 |
| GO:1903170 | negative regu  | 1/29 | 47/18723  | 0.070347403 | 0.177262338 | 0.125833044 |
| GO:0002715 | regulation of  | 1/29 | 48/18723  | 0.071790963 | 0.180060398 | 0.1278193   |
| GO:0033628 | regulation of  | 1/29 | 48/18723  | 0.071790963 | 0.180060398 | 0.1278193   |
| GO:0001913 | T cell mediat  | 1/29 | 49/18723  | 0.073232359 | 0.18115373  | 0.128595422 |
| GO:0007622 | rhythmic beh   | 1/29 | 49/18723  | 0.073232359 | 0.18115373  | 0.128595422 |
| GO:0014075 | response to a  | 1/29 | 49/18723  | 0.073232359 | 0.18115373  | 0.128595422 |
| GO:0018198 | peptidyl-cyst  | 1/29 | 49/18723  | 0.073232359 | 0.18115373  | 0.128595422 |
| GO:0048168 | regulation of  | 1/29 | 49/18723  | 0.073232359 | 0.18115373  | 0.128595422 |
| GO:0051932 | synaptic tran  | 1/29 | 49/18723  | 0.073232359 | 0.18115373  | 0.128595422 |
| GO:0007632 | visual behavi  | 1/29 | 50/18723  | 0.074671593 | 0.183038531 | 0.129933385 |
| GO:0015872 | dopamine tra   | 1/29 | 50/18723  | 0.074671593 | 0.183038531 | 0.129933385 |
| GO:0045814 | negative regu  | 1/29 | 50/18723  | 0.074671593 | 0.183038531 | 0.129933385 |
| GO:0060425 | lung morpho    | 1/29 | 50/18723  | 0.074671593 | 0.183038531 | 0.129933385 |
| GO:0006636 | unsaturated f  | 1/29 | 51/18723  | 0.076108669 | 0.184056984 | 0.130656352 |
| GO:0021872 | forebrain gen  | 1/29 | 51/18723  | 0.076108669 | 0.184056984 | 0.130656352 |
| GO:0046850 | regulation of  | 1/29 | 51/18723  | 0.076108669 | 0.184056984 | 0.130656352 |
| GO:0048013 | ephrin recept  | 1/29 | 51/18723  | 0.076108669 | 0.184056984 | 0.130656352 |
| GO:0051339 | regulation of  | 1/29 | 51/18723  | 0.076108669 | 0.184056984 | 0.130656352 |
| GO:0060043 | regulation of  | 1/29 | 51/18723  | 0.076108669 | 0.184056984 | 0.130656352 |

|            |                 |      |           |             |             |             |
|------------|-----------------|------|-----------|-------------|-------------|-------------|
| GO:0002218 | activation of i | 1/29 | 52/18723  | 0.077543591 | 0.185863906 | 0.13193903  |
| GO:0032206 | positive regul  | 1/29 | 52/18723  | 0.077543591 | 0.185863906 | 0.13193903  |
| GO:0043392 | negative regu   | 1/29 | 52/18723  | 0.077543591 | 0.185863906 | 0.13193903  |
| GO:0048260 | positive regul  | 1/29 | 52/18723  | 0.077543591 | 0.185863906 | 0.13193903  |
| GO:0002707 | negative regu   | 1/29 | 53/18723  | 0.07897636  | 0.186924615 | 0.132691995 |
| GO:0031279 | regulation of   | 1/29 | 53/18723  | 0.07897636  | 0.186924615 | 0.132691995 |
| GO:0032210 | regulation of   | 1/29 | 53/18723  | 0.07897636  | 0.186924615 | 0.132691995 |
| GO:0045744 | negative regu   | 1/29 | 53/18723  | 0.07897636  | 0.186924615 | 0.132691995 |
| GO:0071715 | icosanoid tra   | 1/29 | 53/18723  | 0.07897636  | 0.186924615 | 0.132691995 |
| GO:0090287 | regulation of   | 2/29 | 304/18723 | 0.080085579 | 0.186924615 | 0.132691995 |
| GO:0001706 | endoderm fo     | 1/29 | 54/18723  | 0.08040698  | 0.186924615 | 0.132691995 |
| GO:0002823 | negative regu   | 1/29 | 54/18723  | 0.08040698  | 0.186924615 | 0.132691995 |
| GO:0006584 | catecholamin    | 1/29 | 54/18723  | 0.08040698  | 0.186924615 | 0.132691995 |
| GO:0009712 | catechol-cont   | 1/29 | 54/18723  | 0.08040698  | 0.186924615 | 0.132691995 |
| GO:0014888 | striated musc   | 1/29 | 54/18723  | 0.08040698  | 0.186924615 | 0.132691995 |
| GO:0060350 | endochondra     | 1/29 | 54/18723  | 0.08040698  | 0.186924615 | 0.132691995 |
| GO:1902743 | regulation of   | 1/29 | 54/18723  | 0.08040698  | 0.186924615 | 0.132691995 |
| GO:2000300 | regulation of   | 1/29 | 54/18723  | 0.08040698  | 0.186924615 | 0.132691995 |
| GO:0002067 | glandular epit  | 1/29 | 55/18723  | 0.081835455 | 0.188297055 | 0.133666248 |
| GO:0031113 | regulation of   | 1/29 | 55/18723  | 0.081835455 | 0.188297055 | 0.133666248 |
| GO:0022604 | regulation of   | 2/29 | 309/18723 | 0.082359475 | 0.188297055 | 0.133666248 |
| GO:0070372 | regulation of   | 2/29 | 309/18723 | 0.082359475 | 0.188297055 | 0.133666248 |
| GO:0060326 | cell chemota    | 2/29 | 310/18723 | 0.082816699 | 0.188297055 | 0.133666248 |
| GO:0000288 | nuclear-trans   | 1/29 | 56/18723  | 0.083261788 | 0.188297055 | 0.133666248 |
| GO:0001912 | positive regul  | 1/29 | 56/18723  | 0.083261788 | 0.188297055 | 0.133666248 |
| GO:0002090 | regulation of   | 1/29 | 56/18723  | 0.083261788 | 0.188297055 | 0.133666248 |
| GO:0022029 | telencephalo    | 1/29 | 56/18723  | 0.083261788 | 0.188297055 | 0.133666248 |
| GO:0031529 | ruffle organiz  | 1/29 | 56/18723  | 0.083261788 | 0.188297055 | 0.133666248 |
| GO:0046622 | positive regul  | 1/29 | 56/18723  | 0.083261788 | 0.188297055 | 0.133666248 |
| GO:0050433 | regulation of   | 1/29 | 56/18723  | 0.083261788 | 0.188297055 | 0.133666248 |
| GO:0055078 | sodium ion h    | 1/29 | 56/18723  | 0.083261788 | 0.188297055 | 0.133666248 |
| GO:1900024 | regulation of   | 1/29 | 57/18723  | 0.084685981 | 0.191118048 | 0.135668783 |
| GO:0043666 | regulation of   | 1/29 | 58/18723  | 0.086108037 | 0.193117817 | 0.137088358 |
| GO:0050432 | catecholamin    | 1/29 | 58/18723  | 0.086108037 | 0.193117817 | 0.137088358 |
| GO:2000736 | regulation of   | 1/29 | 58/18723  | 0.086108037 | 0.193117817 | 0.137088358 |
| GO:0007204 | positive regul  | 2/29 | 319/18723 | 0.086967631 | 0.193888781 | 0.137635641 |
| GO:0009416 | response to li  | 2/29 | 320/18723 | 0.087432774 | 0.193888781 | 0.137635641 |
| GO:0002820 | negative regu   | 1/29 | 59/18723  | 0.08752796  | 0.193888781 | 0.137635641 |
| GO:0019369 | arachidonic a   | 1/29 | 59/18723  | 0.08752796  | 0.193888781 | 0.137635641 |
| GO:0021885 | forebrain cell  | 1/29 | 59/18723  | 0.08752796  | 0.193888781 | 0.137635641 |
| GO:2001258 | negative regu   | 1/29 | 59/18723  | 0.08752796  | 0.193888781 | 0.137635641 |
| GO:0060038 | cardiac muscl   | 1/29 | 60/18723  | 0.088945753 | 0.196626502 | 0.139579064 |
| GO:0008544 | epidermis de    | 2/29 | 324/18723 | 0.089301051 | 0.197009052 | 0.139850625 |
| GO:0019748 | secondary m     | 1/29 | 61/18723  | 0.090361419 | 0.197334736 | 0.140081817 |
| GO:0030199 | collagen fibril | 1/29 | 61/18723  | 0.090361419 | 0.197334736 | 0.140081817 |
| GO:0040014 | regulation of   | 1/29 | 61/18723  | 0.090361419 | 0.197334736 | 0.140081817 |
| GO:1904356 | regulation of   | 1/29 | 61/18723  | 0.090361419 | 0.197334736 | 0.140081817 |
| GO:2000401 | regulation of   | 1/29 | 61/18723  | 0.090361419 | 0.197334736 | 0.140081817 |
| GO:0007588 | excretion       | 1/29 | 62/18723  | 0.091774961 | 0.199176868 | 0.14138949  |
| GO:0046148 | pigment bios    | 1/29 | 62/18723  | 0.091774961 | 0.199176868 | 0.14138949  |

|            |                 |      |           |             |             |             |
|------------|-----------------|------|-----------|-------------|-------------|-------------|
| GO:0060393 | regulation of   | 1/29 | 62/18723  | 0.091774961 | 0.199176868 | 0.14138949  |
| GO:0048638 | regulation of   | 2/29 | 330/18723 | 0.092126211 | 0.199176868 | 0.14138949  |
| GO:0070371 | ERK1 and ERk    | 2/29 | 330/18723 | 0.092126211 | 0.199176868 | 0.14138949  |
| GO:0002704 | negative regu   | 1/29 | 63/18723  | 0.093186382 | 0.200666293 | 0.142446787 |
| GO:0031343 | positive regul  | 1/29 | 63/18723  | 0.093186382 | 0.200666293 | 0.142446787 |
| GO:0046888 | negative regu   | 1/29 | 64/18723  | 0.094595685 | 0.202490962 | 0.143742062 |
| GO:0048247 | lymphocyte c    | 1/29 | 64/18723  | 0.094595685 | 0.202490962 | 0.143742062 |
| GO:0070542 | response to f   | 1/29 | 64/18723  | 0.094595685 | 0.202490962 | 0.143742062 |
| GO:0015909 | long-chain fat  | 1/29 | 65/18723  | 0.096002873 | 0.203090227 | 0.144167462 |
| GO:0045453 | bone resorpti   | 1/29 | 65/18723  | 0.096002873 | 0.203090227 | 0.144167462 |
| GO:0048645 | animal organ    | 1/29 | 65/18723  | 0.096002873 | 0.203090227 | 0.144167462 |
| GO:0060389 | pathway-rest    | 1/29 | 65/18723  | 0.096002873 | 0.203090227 | 0.144167462 |
| GO:0071677 | positive regul  | 1/29 | 65/18723  | 0.096002873 | 0.203090227 | 0.144167462 |
| GO:0090307 | mitotic spindl  | 1/29 | 65/18723  | 0.096002873 | 0.203090227 | 0.144167462 |
| GO:0050922 | negative regu   | 1/29 | 66/18723  | 0.09740795  | 0.204462124 | 0.145141329 |
| GO:0071300 | cellular respo  | 1/29 | 66/18723  | 0.09740795  | 0.204462124 | 0.145141329 |
| GO:0072678 | T cell migratic | 1/29 | 66/18723  | 0.09740795  | 0.204462124 | 0.145141329 |
| GO:2000573 | positive regul  | 1/29 | 66/18723  | 0.09740795  | 0.204462124 | 0.145141329 |
| GO:0001933 | negative regu   | 2/29 | 342/18723 | 0.097855849 | 0.204607684 | 0.145244658 |
| GO:0045765 | regulation of   | 2/29 | 342/18723 | 0.097855849 | 0.204607684 | 0.145244658 |
| GO:0061180 | mammary gla     | 1/29 | 67/18723  | 0.098810918 | 0.205829007 | 0.146111637 |
| GO:0030336 | negative regu   | 2/29 | 344/18723 | 0.098820772 | 0.205829007 | 0.146111637 |
| GO:0032922 | circadian regt  | 1/29 | 68/18723  | 0.10021178  | 0.207129893 | 0.147035096 |
| GO:0042267 | natural killer  | 1/29 | 68/18723  | 0.10021178  | 0.207129893 | 0.147035096 |
| GO:0051926 | negative regu   | 1/29 | 68/18723  | 0.10021178  | 0.207129893 | 0.147035096 |
| GO:0060411 | cardiac septu   | 1/29 | 68/18723  | 0.10021178  | 0.207129893 | 0.147035096 |
| GO:0043087 | regulation of   | 2/29 | 348/18723 | 0.100758948 | 0.207467472 | 0.147274733 |
| GO:1901342 | regulation of   | 2/29 | 348/18723 | 0.100758948 | 0.207467472 | 0.147274733 |
| GO:0007004 | telomere mai    | 1/29 | 69/18723  | 0.101610539 | 0.207638928 | 0.147396444 |
| GO:0045669 | positive regul  | 1/29 | 69/18723  | 0.101610539 | 0.207638928 | 0.147396444 |
| GO:0050805 | negative regu   | 1/29 | 69/18723  | 0.101610539 | 0.207638928 | 0.147396444 |
| GO:0051966 | regulation of   | 1/29 | 69/18723  | 0.101610539 | 0.207638928 | 0.147396444 |
| GO:0031346 | positive regul  | 2/29 | 353/18723 | 0.103197031 | 0.210086611 | 0.149133979 |
| GO:0051480 | regulation of   | 2/29 | 353/18723 | 0.103197031 | 0.210086611 | 0.149133979 |
| GO:0002228 | natural killer  | 1/29 | 71/18723  | 0.104401762 | 0.210950103 | 0.149746945 |
| GO:0008344 | adult locomo    | 1/29 | 71/18723  | 0.104401762 | 0.210950103 | 0.149746945 |
| GO:0050795 | regulation of   | 1/29 | 71/18723  | 0.104401762 | 0.210950103 | 0.149746945 |
| GO:0071230 | cellular respo  | 1/29 | 71/18723  | 0.104401762 | 0.210950103 | 0.149746945 |
| GO:0002460 | adaptive imm    | 2/29 | 356/18723 | 0.104667926 | 0.211093336 | 0.149848621 |
| GO:0001818 | negative regu   | 2/29 | 357/18723 | 0.105159547 | 0.211392912 | 0.150061281 |
| GO:0030032 | lamellipodiun   | 1/29 | 72/18723  | 0.105794232 | 0.211392912 | 0.150061281 |
| GO:0033627 | cell adhesion   | 1/29 | 72/18723  | 0.105794232 | 0.211392912 | 0.150061281 |
| GO:0050709 | negative regu   | 1/29 | 72/18723  | 0.105794232 | 0.211392912 | 0.150061281 |
| GO:0055021 | regulation of   | 1/29 | 72/18723  | 0.105794232 | 0.211392912 | 0.150061281 |
| GO:2000146 | negative regu   | 2/29 | 359/18723 | 0.106144754 | 0.211701991 | 0.150280687 |
| GO:0051145 | smooth musc     | 1/29 | 73/18723  | 0.107184612 | 0.212599203 | 0.15091759  |
| GO:0051937 | catecholamin    | 1/29 | 73/18723  | 0.107184612 | 0.212599203 | 0.15091759  |
| GO:0072089 | stem cell prol  | 1/29 | 73/18723  | 0.107184612 | 0.212599203 | 0.15091759  |
| GO:0031589 | cell-substrate  | 2/29 | 363/18723 | 0.108122946 | 0.213676243 | 0.151682147 |
| GO:0051098 | regulation of   | 2/29 | 363/18723 | 0.108122946 | 0.213676243 | 0.151682147 |

|            |                 |      |           |             |             |             |
|------------|-----------------|------|-----------|-------------|-------------|-------------|
| GO:0003151 | outflow tract   | 1/29 | 74/18723  | 0.108572904 | 0.213874761 | 0.151823069 |
| GO:0050767 | regulation of   | 2/29 | 364/18723 | 0.108619097 | 0.213874761 | 0.151823069 |
| GO:0006278 | RNA-depende     | 1/29 | 75/18723  | 0.109959111 | 0.215634723 | 0.153072412 |
| GO:0043627 | response to e   | 1/29 | 75/18723  | 0.109959111 | 0.215634723 | 0.153072412 |
| GO:0051271 | negative regu   | 2/29 | 367/18723 | 0.110111348 | 0.215634723 | 0.153072412 |
| GO:0006305 | DNA alkylatio   | 1/29 | 76/18723  | 0.111343238 | 0.216478489 | 0.153671375 |
| GO:0006306 | DNA methyla     | 1/29 | 76/18723  | 0.111343238 | 0.216478489 | 0.153671375 |
| GO:0014855 | striated musc   | 1/29 | 76/18723  | 0.111343238 | 0.216478489 | 0.153671375 |
| GO:0021536 | diencephalon    | 1/29 | 76/18723  | 0.111343238 | 0.216478489 | 0.153671375 |
| GO:0007492 | endoderm de     | 1/29 | 77/18723  | 0.112725286 | 0.217989327 | 0.154743872 |
| GO:0031016 | pancreas dev    | 1/29 | 77/18723  | 0.112725286 | 0.217989327 | 0.154743872 |
| GO:0032418 | lysosome loci   | 1/29 | 77/18723  | 0.112725286 | 0.217989327 | 0.154743872 |
| GO:0010038 | response to n   | 2/29 | 373/18723 | 0.113112678 | 0.218347867 | 0.154998388 |
| GO:0007193 | adenylate cyc   | 1/29 | 78/18723  | 0.114105258 | 0.219090202 | 0.155525349 |
| GO:0008306 | associative le  | 1/29 | 78/18723  | 0.114105258 | 0.219090202 | 0.155525349 |
| GO:0070373 | negative regu   | 1/29 | 78/18723  | 0.114105258 | 0.219090202 | 0.155525349 |
| GO:0010770 | positive regul  | 1/29 | 79/18723  | 0.115483158 | 0.220950963 | 0.156846246 |
| GO:0060420 | regulation of   | 1/29 | 79/18723  | 0.115483158 | 0.220950963 | 0.156846246 |
| GO:0001570 | vasculogenes    | 1/29 | 80/18723  | 0.116858989 | 0.222011541 | 0.157599117 |
| GO:0032204 | regulation of   | 1/29 | 80/18723  | 0.116858989 | 0.222011541 | 0.157599117 |
| GO:0032272 | negative regu   | 1/29 | 80/18723  | 0.116858989 | 0.222011541 | 0.157599117 |
| GO:0071229 | cellular respo  | 1/29 | 80/18723  | 0.116858989 | 0.222011541 | 0.157599117 |
| GO:0006096 | glycolytic pro  | 1/29 | 81/18723  | 0.118232753 | 0.222664819 | 0.158062859 |
| GO:0010833 | telomere mai    | 1/29 | 81/18723  | 0.118232753 | 0.222664819 | 0.158062859 |
| GO:0021954 | central nervo   | 1/29 | 81/18723  | 0.118232753 | 0.222664819 | 0.158062859 |
| GO:0030512 | negative regu   | 1/29 | 81/18723  | 0.118232753 | 0.222664819 | 0.158062859 |
| GO:0048144 | fibroblast pro  | 1/29 | 81/18723  | 0.118232753 | 0.222664819 | 0.158062859 |
| GO:0042326 | negative regu   | 2/29 | 385/18723 | 0.119180438 | 0.222917957 | 0.158242554 |
| GO:0001892 | embryonic pl    | 1/29 | 82/18723  | 0.119604454 | 0.222917957 | 0.158242554 |
| GO:0001910 | regulation of   | 1/29 | 82/18723  | 0.119604454 | 0.222917957 | 0.158242554 |
| GO:0006757 | ATP generatic   | 1/29 | 82/18723  | 0.119604454 | 0.222917957 | 0.158242554 |
| GO:0008543 | fibroblast gro  | 1/29 | 82/18723  | 0.119604454 | 0.222917957 | 0.158242554 |
| GO:2001252 | positive regul  | 1/29 | 82/18723  | 0.119604454 | 0.222917957 | 0.158242554 |
| GO:0046785 | microtubule     | 1/29 | 83/18723  | 0.120974095 | 0.22469587  | 0.159504639 |
| GO:0048678 | response to a   | 1/29 | 83/18723  | 0.120974095 | 0.22469587  | 0.159504639 |
| GO:0006631 | fatty acid me   | 2/29 | 390/18723 | 0.12173335  | 0.224917269 | 0.159661803 |
| GO:0040013 | negative regu   | 2/29 | 391/18723 | 0.122245623 | 0.224917269 | 0.159661803 |
| GO:0010921 | regulation of   | 1/29 | 84/18723  | 0.122341678 | 0.224917269 | 0.159661803 |
| GO:0015844 | monoamine t     | 1/29 | 84/18723  | 0.122341678 | 0.224917269 | 0.159661803 |
| GO:0042440 | pigment met     | 1/29 | 84/18723  | 0.122341678 | 0.224917269 | 0.159661803 |
| GO:0061157 | mRNA destab     | 1/29 | 84/18723  | 0.122341678 | 0.224917269 | 0.159661803 |
| GO:0001656 | metanephros     | 1/29 | 85/18723  | 0.123707207 | 0.22627325  | 0.160624372 |
| GO:0002709 | regulation of   | 1/29 | 85/18723  | 0.123707207 | 0.22627325  | 0.160624372 |
| GO:0098773 | skin epidermi   | 1/29 | 85/18723  | 0.123707207 | 0.22627325  | 0.160624372 |
| GO:0015908 | fatty acid trar | 1/29 | 86/18723  | 0.125070684 | 0.22722926  | 0.161303014 |
| GO:0032413 | negative regu   | 1/29 | 86/18723  | 0.125070684 | 0.22722926  | 0.161303014 |
| GO:0034103 | regulation of   | 1/29 | 86/18723  | 0.125070684 | 0.22722926  | 0.161303014 |
| GO:0046928 | regulation of   | 1/29 | 86/18723  | 0.125070684 | 0.22722926  | 0.161303014 |
| GO:0048041 | focal adhesio   | 1/29 | 87/18723  | 0.126432113 | 0.22893319  | 0.162512581 |
| GO:0061014 | positive regul  | 1/29 | 87/18723  | 0.126432113 | 0.22893319  | 0.162512581 |

|            |                |      |           |             |             |             |
|------------|----------------|------|-----------|-------------|-------------|-------------|
| GO:0031110 | regulation of  | 1/29 | 88/18723  | 0.127791497 | 0.23023768  | 0.163438598 |
| GO:0050779 | RNA destabili  | 1/29 | 88/18723  | 0.127791497 | 0.23023768  | 0.163438598 |
| GO:0070098 | chemokine-r    | 1/29 | 88/18723  | 0.127791497 | 0.23023768  | 0.163438598 |
| GO:0046330 | positive regul | 1/29 | 89/18723  | 0.129148837 | 0.232031207 | 0.164711768 |
| GO:0002028 | regulation of  | 1/29 | 90/18723  | 0.130504139 | 0.232031207 | 0.164711768 |
| GO:0035278 | miRNA media    | 1/29 | 90/18723  | 0.130504139 | 0.232031207 | 0.164711768 |
| GO:0035304 | regulation of  | 1/29 | 90/18723  | 0.130504139 | 0.232031207 | 0.164711768 |
| GO:0040033 | negative regu  | 1/29 | 90/18723  | 0.130504139 | 0.232031207 | 0.164711768 |
| GO:0046031 | ADP metaboli   | 1/29 | 90/18723  | 0.130504139 | 0.232031207 | 0.164711768 |
| GO:0046849 | bone remode    | 1/29 | 90/18723  | 0.130504139 | 0.232031207 | 0.164711768 |
| GO:0097581 | lamellipodiun  | 1/29 | 90/18723  | 0.130504139 | 0.232031207 | 0.164711768 |
| GO:0001503 | ossification   | 2/29 | 408/18723 | 0.131037246 | 0.232525046 | 0.165062328 |
| GO:0002065 | columnar/cut   | 1/29 | 91/18723  | 0.131857403 | 0.232525046 | 0.165062328 |
| GO:0045974 | regulation of  | 1/29 | 91/18723  | 0.131857403 | 0.232525046 | 0.165062328 |
| GO:0051952 | regulation of  | 1/29 | 91/18723  | 0.131857403 | 0.232525046 | 0.165062328 |
| GO:0072080 | nephron tubu   | 1/29 | 91/18723  | 0.131857403 | 0.232525046 | 0.165062328 |
| GO:0006497 | protein lipida | 1/29 | 92/18723  | 0.133208634 | 0.233384982 | 0.16567277  |
| GO:0032465 | regulation of  | 1/29 | 92/18723  | 0.133208634 | 0.233384982 | 0.16567277  |
| GO:0035249 | synaptic tran  | 1/29 | 92/18723  | 0.133208634 | 0.233384982 | 0.16567277  |
| GO:1903351 | cellular respo | 1/29 | 92/18723  | 0.133208634 | 0.233384982 | 0.16567277  |
| GO:0033273 | response to v  | 1/29 | 93/18723  | 0.134557834 | 0.233478361 | 0.165739058 |
| GO:0060349 | bone morphic   | 1/29 | 93/18723  | 0.134557834 | 0.233478361 | 0.165739058 |
| GO:0060993 | kidney morpt   | 1/29 | 93/18723  | 0.134557834 | 0.233478361 | 0.165739058 |
| GO:0097306 | cellular respo | 1/29 | 93/18723  | 0.134557834 | 0.233478361 | 0.165739058 |
| GO:1901019 | regulation of  | 1/29 | 93/18723  | 0.134557834 | 0.233478361 | 0.165739058 |
| GO:1903350 | response to d  | 1/29 | 93/18723  | 0.134557834 | 0.233478361 | 0.165739058 |
| GO:0002690 | positive regul | 1/29 | 94/18723  | 0.135905007 | 0.234685803 | 0.166596183 |
| GO:0061326 | renal tubule c | 1/29 | 94/18723  | 0.135905007 | 0.234685803 | 0.166596183 |
| GO:1902414 | protein locali | 1/29 | 94/18723  | 0.135905007 | 0.234685803 | 0.166596183 |
| GO:0007044 | cell-substrate | 1/29 | 95/18723  | 0.137250155 | 0.236630649 | 0.167976769 |
| GO:0003073 | regulation of  | 1/29 | 96/18723  | 0.13859328  | 0.237431594 | 0.168545335 |
| GO:0010769 | regulation of  | 1/29 | 96/18723  | 0.13859328  | 0.237431594 | 0.168545335 |
| GO:0042158 | lipoprotein bi | 1/29 | 96/18723  | 0.13859328  | 0.237431594 | 0.168545335 |
| GO:0055017 | cardiac muscl  | 1/29 | 96/18723  | 0.13859328  | 0.237431594 | 0.168545335 |
| GO:0010596 | negative regu  | 1/29 | 97/18723  | 0.139934387 | 0.238219011 | 0.169104299 |
| GO:0120162 | positive regul | 1/29 | 97/18723  | 0.139934387 | 0.238219011 | 0.169104299 |
| GO:1990868 | response to c  | 1/29 | 97/18723  | 0.139934387 | 0.238219011 | 0.169104299 |
| GO:1990869 | cellular respo | 1/29 | 97/18723  | 0.139934387 | 0.238219011 | 0.169104299 |
| GO:0050808 | synapse organ  | 2/29 | 426/18723 | 0.140506606 | 0.238817046 | 0.169528824 |
| GO:0032103 | positive regul | 2/29 | 427/18723 | 0.141037222 | 0.238967456 | 0.169635596 |
| GO:0048568 | embryonic or   | 2/29 | 427/18723 | 0.141037222 | 0.238967456 | 0.169635596 |
| GO:0003300 | cardiac muscl  | 1/29 | 99/18723  | 0.142610555 | 0.239382003 | 0.16992987  |
| GO:0006165 | nucleoside di  | 1/29 | 99/18723  | 0.142610555 | 0.239382003 | 0.16992987  |
| GO:0007631 | feeding beha   | 1/29 | 99/18723  | 0.142610555 | 0.239382003 | 0.16992987  |
| GO:0015837 | amine transp   | 1/29 | 99/18723  | 0.142610555 | 0.239382003 | 0.16992987  |
| GO:0031341 | regulation of  | 1/29 | 99/18723  | 0.142610555 | 0.239382003 | 0.16992987  |
| GO:0060291 | long-term syr  | 1/29 | 99/18723  | 0.142610555 | 0.239382003 | 0.16992987  |
| GO:0044728 | DNA methylat   | 1/29 | 100/18723 | 0.143945622 | 0.240131509 | 0.170461921 |
| GO:0045807 | positive regul | 1/29 | 100/18723 | 0.143945622 | 0.240131509 | 0.170461921 |
| GO:0051588 | regulation of  | 1/29 | 100/18723 | 0.143945622 | 0.240131509 | 0.170461921 |

|            |                 |      |           |             |             |             |
|------------|-----------------|------|-----------|-------------|-------------|-------------|
| GO:0060079 | excitatory po   | 1/29 | 100/18723 | 0.143945622 | 0.240131509 | 0.170461921 |
| GO:0002683 | negative regu   | 2/29 | 434/18723 | 0.144764293 | 0.24086849  | 0.170985082 |
| GO:0006576 | cellular bioge  | 1/29 | 101/18723 | 0.145278683 | 0.24086849  | 0.170985082 |
| GO:0046939 | nucleotide pt   | 1/29 | 101/18723 | 0.145278683 | 0.24086849  | 0.170985082 |
| GO:0150115 | cell-substrate  | 1/29 | 101/18723 | 0.145278683 | 0.24086849  | 0.170985082 |
| GO:0045785 | positive regul  | 2/29 | 437/18723 | 0.146368303 | 0.241143916 | 0.171180598 |
| GO:0014897 | striated musc   | 1/29 | 102/18723 | 0.146609738 | 0.241143916 | 0.171180598 |
| GO:1904063 | negative regu   | 1/29 | 102/18723 | 0.146609738 | 0.241143916 | 0.171180598 |
| GO:0002027 | regulation of   | 1/29 | 103/18723 | 0.147938792 | 0.241143916 | 0.171180598 |
| GO:0003279 | cardiac septu   | 1/29 | 103/18723 | 0.147938792 | 0.241143916 | 0.171180598 |
| GO:0009135 | purine nuclec   | 1/29 | 103/18723 | 0.147938792 | 0.241143916 | 0.171180598 |
| GO:0009179 | purine ribonu   | 1/29 | 103/18723 | 0.147938792 | 0.241143916 | 0.171180598 |
| GO:0030593 | neutrophil ch   | 1/29 | 103/18723 | 0.147938792 | 0.241143916 | 0.171180598 |
| GO:0090277 | positive regul  | 1/29 | 103/18723 | 0.147938792 | 0.241143916 | 0.171180598 |
| GO:0045936 | negative regu   | 2/29 | 441/18723 | 0.148513067 | 0.241143916 | 0.171180598 |
| GO:0010563 | negative regu   | 2/29 | 442/18723 | 0.149050328 | 0.241143916 | 0.171180598 |
| GO:0007200 | phospholipas    | 1/29 | 104/18723 | 0.149265848 | 0.241143916 | 0.171180598 |
| GO:0014896 | muscle hyper    | 1/29 | 104/18723 | 0.149265848 | 0.241143916 | 0.171180598 |
| GO:0032006 | regulation of   | 1/29 | 104/18723 | 0.149265848 | 0.241143916 | 0.171180598 |
| GO:0060419 | heart growth    | 1/29 | 104/18723 | 0.149265848 | 0.241143916 | 0.171180598 |
| GO:0051960 | regulation of   | 2/29 | 443/18723 | 0.149588012 | 0.241143916 | 0.171180598 |
| GO:0016055 | Wnt signaling   | 2/29 | 444/18723 | 0.150126116 | 0.241143916 | 0.171180598 |
| GO:0016079 | synaptic vesic  | 1/29 | 105/18723 | 0.150590908 | 0.241143916 | 0.171180598 |
| GO:0040029 | regulation of   | 1/29 | 105/18723 | 0.150590908 | 0.241143916 | 0.171180598 |
| GO:0120034 | positive regul  | 1/29 | 105/18723 | 0.150590908 | 0.241143916 | 0.171180598 |
| GO:0198738 | cell-cell signa | 2/29 | 446/18723 | 0.151203577 | 0.241143916 | 0.171180598 |
| GO:0001824 | blastocyst de   | 1/29 | 106/18723 | 0.151913975 | 0.241143916 | 0.171180598 |
| GO:0002793 | positive regul  | 1/29 | 106/18723 | 0.151913975 | 0.241143916 | 0.171180598 |
| GO:0006090 | pyruvate met    | 1/29 | 106/18723 | 0.151913975 | 0.241143916 | 0.171180598 |
| GO:0006906 | vesicle fusion  | 1/29 | 106/18723 | 0.151913975 | 0.241143916 | 0.171180598 |
| GO:0009185 | ribonucleosid   | 1/29 | 106/18723 | 0.151913975 | 0.241143916 | 0.171180598 |
| GO:0046620 | regulation of   | 1/29 | 106/18723 | 0.151913975 | 0.241143916 | 0.171180598 |
| GO:0099565 | chemical syna   | 1/29 | 106/18723 | 0.151913975 | 0.241143916 | 0.171180598 |
| GO:2000278 | regulation of   | 1/29 | 106/18723 | 0.151913975 | 0.241143916 | 0.171180598 |
| GO:0006874 | cellular calciu | 2/29 | 448/18723 | 0.15228269  | 0.241374762 | 0.171344468 |
| GO:0021761 | limbic system   | 1/29 | 107/18723 | 0.153235052 | 0.241820571 | 0.171660934 |
| GO:0071868 | cellular respo  | 1/29 | 107/18723 | 0.153235052 | 0.241820571 | 0.171660934 |
| GO:0071870 | cellular respo  | 1/29 | 107/18723 | 0.153235052 | 0.241820571 | 0.171660934 |
| GO:0003012 | muscle syster   | 2/29 | 452/18723 | 0.154445796 | 0.24319218  | 0.172634597 |
| GO:0034446 | substrate adh   | 1/29 | 108/18723 | 0.154554142 | 0.24319218  | 0.172634597 |
| GO:0002456 | T cell mediatε  | 1/29 | 109/18723 | 0.155871248 | 0.243377814 | 0.172766372 |
| GO:0032410 | negative regu   | 1/29 | 109/18723 | 0.155871248 | 0.243377814 | 0.172766372 |
| GO:0034766 | negative regu   | 1/29 | 109/18723 | 0.155871248 | 0.243377814 | 0.172766372 |
| GO:0043266 | regulation of   | 1/29 | 109/18723 | 0.155871248 | 0.243377814 | 0.172766372 |
| GO:0072009 | nephron epitl   | 1/29 | 109/18723 | 0.155871248 | 0.243377814 | 0.172766372 |
| GO:0002698 | negative regu   | 1/29 | 110/18723 | 0.157186373 | 0.243377814 | 0.172766372 |
| GO:0003014 | renal system    | 1/29 | 110/18723 | 0.157186373 | 0.243377814 | 0.172766372 |
| GO:0006939 | smooth musc     | 1/29 | 110/18723 | 0.157186373 | 0.243377814 | 0.172766372 |
| GO:0007088 | regulation of   | 1/29 | 110/18723 | 0.157186373 | 0.243377814 | 0.172766372 |
| GO:0048259 | regulation of   | 1/29 | 110/18723 | 0.157186373 | 0.243377814 | 0.172766372 |

|            |                 |      |           |             |             |             |
|------------|-----------------|------|-----------|-------------|-------------|-------------|
| GO:0090174 | organelle me    | 1/29 | 110/18723 | 0.157186373 | 0.243377814 | 0.172766372 |
| GO:0006805 | xenobiotic m    | 1/29 | 111/18723 | 0.15849952  | 0.243377814 | 0.172766372 |
| GO:0014066 | regulation of   | 1/29 | 111/18723 | 0.15849952  | 0.243377814 | 0.172766372 |
| GO:0015718 | monocarboxy     | 1/29 | 111/18723 | 0.15849952  | 0.243377814 | 0.172766372 |
| GO:0071867 | response to n   | 1/29 | 111/18723 | 0.15849952  | 0.243377814 | 0.172766372 |
| GO:0071869 | response to c   | 1/29 | 111/18723 | 0.15849952  | 0.243377814 | 0.172766372 |
| GO:0090288 | negative regu   | 1/29 | 111/18723 | 0.15849952  | 0.243377814 | 0.172766372 |
| GO:0055074 | calcium ion h   | 2/29 | 460/18723 | 0.158790988 | 0.243479514 | 0.172838567 |
| GO:0000956 | nuclear-trans   | 1/29 | 112/18723 | 0.159810691 | 0.244004741 | 0.173211409 |
| GO:0001676 | long-chain fat  | 1/29 | 112/18723 | 0.159810691 | 0.244004741 | 0.173211409 |
| GO:0010633 | negative regu   | 1/29 | 112/18723 | 0.159810691 | 0.244004741 | 0.173211409 |
| GO:0002708 | positive regul  | 1/29 | 113/18723 | 0.161119889 | 0.244965682 | 0.173893551 |
| GO:0031623 | receptor inte   | 1/29 | 113/18723 | 0.161119889 | 0.244965682 | 0.173893551 |
| GO:0044106 | cellular amin   | 1/29 | 113/18723 | 0.161119889 | 0.244965682 | 0.173893551 |
| GO:0007041 | lysosomal tra   | 1/29 | 114/18723 | 0.162427118 | 0.246542289 | 0.175012735 |
| GO:0001819 | positive regul  | 2/29 | 467/18723 | 0.162612999 | 0.246542289 | 0.175012735 |
| GO:0006417 | regulation of   | 2/29 | 468/18723 | 0.163160472 | 0.246854536 | 0.17523439  |
| GO:0051209 | release of sec  | 1/29 | 115/18723 | 0.163732379 | 0.246854536 | 0.17523439  |
| GO:0071675 | regulation of   | 1/29 | 115/18723 | 0.163732379 | 0.246854536 | 0.17523439  |
| GO:0090630 | activation of   | 1/29 | 115/18723 | 0.163732379 | 0.246854536 | 0.17523439  |
| GO:0043200 | response to a   | 1/29 | 116/18723 | 0.165035677 | 0.248127353 | 0.176137923 |
| GO:0051283 | negative regu   | 1/29 | 116/18723 | 0.165035677 | 0.248127353 | 0.176137923 |
| GO:0051225 | spindle assen   | 1/29 | 117/18723 | 0.166337013 | 0.249264015 | 0.176944804 |
| GO:0072676 | lymphocyte n    | 1/29 | 117/18723 | 0.166337013 | 0.249264015 | 0.176944804 |
| GO:0001667 | ameboidal-ty    | 2/29 | 475/18723 | 0.167002757 | 0.249264015 | 0.176944804 |
| GO:0007613 | memory          | 1/29 | 118/18723 | 0.167636391 | 0.249264015 | 0.176944804 |
| GO:0009308 | amine metab     | 1/29 | 118/18723 | 0.167636391 | 0.249264015 | 0.176944804 |
| GO:0051101 | regulation of   | 1/29 | 118/18723 | 0.167636391 | 0.249264015 | 0.176944804 |
| GO:0051282 | regulation of   | 1/29 | 118/18723 | 0.167636391 | 0.249264015 | 0.176944804 |
| GO:1903313 | positive regul  | 1/29 | 118/18723 | 0.167636391 | 0.249264015 | 0.176944804 |
| GO:0043410 | positive regul  | 2/29 | 480/18723 | 0.169757636 | 0.252071435 | 0.178937705 |
| GO:0006304 | DNA modific     | 1/29 | 120/18723 | 0.170229283 | 0.252079254 | 0.178943255 |
| GO:0007052 | mitotic spindl  | 1/29 | 120/18723 | 0.170229283 | 0.252079254 | 0.178943255 |
| GO:0001704 | formation of    | 1/29 | 121/18723 | 0.171522803 | 0.252266871 | 0.179076439 |
| GO:0003206 | cardiac cham    | 1/29 | 121/18723 | 0.171522803 | 0.252266871 | 0.179076439 |
| GO:0042752 | regulation of   | 1/29 | 121/18723 | 0.171522803 | 0.252266871 | 0.179076439 |
| GO:0043500 | muscle adapt    | 1/29 | 121/18723 | 0.171522803 | 0.252266871 | 0.179076439 |
| GO:1904019 | epithelial cell | 1/29 | 121/18723 | 0.171522803 | 0.252266871 | 0.179076439 |
| GO:0002688 | regulation of   | 1/29 | 122/18723 | 0.172814376 | 0.252790718 | 0.179448302 |
| GO:0031109 | microtubule     | 1/29 | 122/18723 | 0.172814376 | 0.252790718 | 0.179448302 |
| GO:0051208 | sequestering    | 1/29 | 122/18723 | 0.172814376 | 0.252790718 | 0.179448302 |
| GO:1990266 | neutrophil mi   | 1/29 | 122/18723 | 0.172814376 | 0.252790718 | 0.179448302 |
| GO:0072503 | cellular divale | 2/29 | 486/18723 | 0.173074473 | 0.252829061 | 0.17947552  |
| GO:0006690 | icosanoid me    | 1/29 | 123/18723 | 0.174104005 | 0.253647479 | 0.18005649  |
| GO:0010811 | positive regul  | 1/29 | 123/18723 | 0.174104005 | 0.253647479 | 0.18005649  |
| GO:0001909 | leukocyte me    | 1/29 | 124/18723 | 0.175391692 | 0.254836585 | 0.180900599 |
| GO:0009132 | nucleoside di   | 1/29 | 124/18723 | 0.175391692 | 0.254836585 | 0.180900599 |
| GO:0055007 | cardiac muscl   | 1/29 | 125/18723 | 0.176677441 | 0.256016506 | 0.181738189 |
| GO:0071621 | granulocyte c   | 1/29 | 125/18723 | 0.176677441 | 0.256016506 | 0.181738189 |
| GO:0031929 | TOR signaling   | 1/29 | 126/18723 | 0.177961254 | 0.25718732  | 0.182569313 |

|            |                |      |           |             |             |             |
|------------|----------------|------|-----------|-------------|-------------|-------------|
| GO:0032874 | positive regul | 1/29 | 126/18723 | 0.177961254 | 0.25718732  | 0.182569313 |
| GO:0048565 | digestive trac | 1/29 | 127/18723 | 0.179243134 | 0.258349104 | 0.183394028 |
| GO:0051224 | negative regu  | 1/29 | 127/18723 | 0.179243134 | 0.258349104 | 0.183394028 |
| GO:0017015 | regulation of  | 1/29 | 128/18723 | 0.180523084 | 0.259157309 | 0.183967747 |
| GO:0035303 | regulation of  | 1/29 | 128/18723 | 0.180523084 | 0.259157309 | 0.183967747 |
| GO:0070304 | positive regul | 1/29 | 128/18723 | 0.180523084 | 0.259157309 | 0.183967747 |
| GO:0007098 | centrosome c   | 1/29 | 130/18723 | 0.183077205 | 0.262127759 | 0.186076378 |
| GO:0030534 | adult behavic  | 1/29 | 130/18723 | 0.183077205 | 0.262127759 | 0.186076378 |
| GO:0000723 | telomere mai   | 1/29 | 131/18723 | 0.184351381 | 0.262215583 | 0.186138721 |
| GO:0045089 | positive regul | 1/29 | 131/18723 | 0.184351381 | 0.262215583 | 0.186138721 |
| GO:0090101 | negative regu  | 1/29 | 131/18723 | 0.184351381 | 0.262215583 | 0.186138721 |
| GO:1903844 | regulation of  | 1/29 | 131/18723 | 0.184351381 | 0.262215583 | 0.186138721 |
| GO:1904950 | negative regu  | 1/29 | 131/18723 | 0.184351381 | 0.262215583 | 0.186138721 |
| GO:0035264 | multicellular  | 1/29 | 132/18723 | 0.185623638 | 0.263332222 | 0.186931389 |
| GO:0045667 | regulation of  | 1/29 | 132/18723 | 0.185623638 | 0.263332222 | 0.186931389 |
| GO:0046328 | regulation of  | 1/29 | 133/18723 | 0.18689398  | 0.264440304 | 0.187717982 |
| GO:0046887 | positive regul | 1/29 | 133/18723 | 0.18689398  | 0.264440304 | 0.187717982 |
| GO:0002705 | positive regul | 1/29 | 134/18723 | 0.188162408 | 0.265193693 | 0.18825279  |
| GO:0008277 | regulation of  | 1/29 | 134/18723 | 0.188162408 | 0.265193693 | 0.18825279  |
| GO:0032147 | activation of  | 1/29 | 134/18723 | 0.188162408 | 0.265193693 | 0.18825279  |
| GO:0001101 | response to a  | 1/29 | 135/18723 | 0.189428925 | 0.26593853  | 0.188781526 |
| GO:0002687 | positive regul | 1/29 | 135/18723 | 0.189428925 | 0.26593853  | 0.188781526 |
| GO:0042157 | lipoprotein m  | 1/29 | 135/18723 | 0.189428925 | 0.26593853  | 0.188781526 |
| GO:0045727 | positive regul | 1/29 | 136/18723 | 0.190693534 | 0.266674917 | 0.189304264 |
| GO:0072073 | kidney epithe  | 1/29 | 136/18723 | 0.190693534 | 0.266674917 | 0.189304264 |
| GO:1903305 | regulation of  | 1/29 | 136/18723 | 0.190693534 | 0.266674917 | 0.189304264 |
| GO:0030879 | mammary gla    | 1/29 | 137/18723 | 0.191956239 | 0.267402956 | 0.189821077 |
| GO:0055123 | digestive syst | 1/29 | 137/18723 | 0.191956239 | 0.267402956 | 0.189821077 |
| GO:0060078 | regulation of  | 1/29 | 137/18723 | 0.191956239 | 0.267402956 | 0.189821077 |
| GO:0007224 | smoothened     | 1/29 | 138/18723 | 0.193217041 | 0.268812897 | 0.190821951 |
| GO:0051783 | regulation of  | 1/29 | 139/18723 | 0.194475944 | 0.270216575 | 0.191818378 |
| GO:0008584 | male gonad d   | 1/29 | 141/18723 | 0.196988061 | 0.271959252 | 0.19305545  |
| GO:0031333 | negative regu  | 1/29 | 141/18723 | 0.196988061 | 0.271959252 | 0.19305545  |
| GO:0032355 | response to e  | 1/29 | 141/18723 | 0.196988061 | 0.271959252 | 0.19305545  |
| GO:0048284 | organelle fusi | 1/29 | 141/18723 | 0.196988061 | 0.271959252 | 0.19305545  |
| GO:0050921 | positive regul | 1/29 | 141/18723 | 0.196988061 | 0.271959252 | 0.19305545  |
| GO:0046546 | development    | 1/29 | 142/18723 | 0.198241282 | 0.272644817 | 0.193542111 |
| GO:0072006 | nephron dev    | 1/29 | 142/18723 | 0.198241282 | 0.272644817 | 0.193542111 |
| GO:0097553 | calcium ion tr | 1/29 | 142/18723 | 0.198241282 | 0.272644817 | 0.193542111 |
| GO:0030010 | establishmen   | 1/29 | 143/18723 | 0.199492614 | 0.27332258  | 0.194023235 |
| GO:0031023 | microtubule    | 1/29 | 143/18723 | 0.199492614 | 0.27332258  | 0.194023235 |
| GO:0034763 | negative regu  | 1/29 | 143/18723 | 0.199492614 | 0.27332258  | 0.194023235 |
| GO:0007612 | learning       | 1/29 | 144/18723 | 0.200742061 | 0.273647122 | 0.194253617 |
| GO:0014065 | phosphatidyli  | 1/29 | 144/18723 | 0.200742061 | 0.273647122 | 0.194253617 |
| GO:0106106 | cold-induced   | 1/29 | 144/18723 | 0.200742061 | 0.273647122 | 0.194253617 |
| GO:0120161 | regulation of  | 1/29 | 144/18723 | 0.200742061 | 0.273647122 | 0.194253617 |
| GO:0007269 | neurotransmi   | 1/29 | 145/18723 | 0.201989624 | 0.274655074 | 0.194969131 |
| GO:0099643 | signal release | 1/29 | 145/18723 | 0.201989624 | 0.274655074 | 0.194969131 |
| GO:0007189 | adenylate cyc  | 1/29 | 146/18723 | 0.203235307 | 0.276001717 | 0.195925071 |
| GO:0001889 | liver develop  | 1/29 | 147/18723 | 0.204479113 | 0.276253973 | 0.196104139 |



|            |                      |           |             |             |             |
|------------|----------------------|-----------|-------------|-------------|-------------|
| GO:0016331 | morphogene: 1/29     | 147/18723 | 0.204479113 | 0.276253973 | 0.196104139 |
| GO:1902850 | microtubule c 1/29   | 147/18723 | 0.204479113 | 0.276253973 | 0.196104139 |
| GO:1903531 | negative regu 1/29   | 147/18723 | 0.204479113 | 0.276253973 | 0.196104139 |
| GO:0010212 | response to ic 1/29  | 148/18723 | 0.205721043 | 0.276253973 | 0.196104139 |
| GO:0050905 | neuromusculi 1/29    | 148/18723 | 0.205721043 | 0.276253973 | 0.196104139 |
| GO:0051384 | response to g 1/29   | 148/18723 | 0.205721043 | 0.276253973 | 0.196104139 |
| GO:0070507 | regulation of 1/29   | 148/18723 | 0.205721043 | 0.276253973 | 0.196104139 |
| GO:0097530 | granulocyte n 1/29   | 148/18723 | 0.205721043 | 0.276253973 | 0.196104139 |
| GO:0061008 | hepaticobiliar 1/29  | 150/18723 | 0.208199291 | 0.27923503  | 0.1982203   |
| GO:0055067 | monovalent i 1/29    | 151/18723 | 0.209435614 | 0.280545104 | 0.199150281 |
| GO:0120254 | olefinic comp 1/29   | 153/18723 | 0.21190267  | 0.283498498 | 0.201246804 |
| GO:0016052 | carbohydrate 1/29    | 154/18723 | 0.213133409 | 0.284792602 | 0.202165448 |
| GO:0001764 | neuron migra 1/29    | 156/18723 | 0.215589322 | 0.287363819 | 0.203990676 |
| GO:0035051 | cardiocyte dif 1/29  | 156/18723 | 0.215589322 | 0.287363819 | 0.203990676 |
| GO:0007030 | Golgi organiz: 1/29  | 157/18723 | 0.216814502 | 0.287931789 | 0.20439386  |
| GO:0007034 | vacuolar tran 1/29   | 157/18723 | 0.216814502 | 0.287931789 | 0.20439386  |
| GO:1990845 | adaptive ther 1/29   | 157/18723 | 0.216814502 | 0.287931789 | 0.20439386  |
| GO:0043488 | regulation of 1/29   | 158/18723 | 0.218037834 | 0.289201102 | 0.205294906 |
| GO:0032200 | telomere org: 1/29   | 159/18723 | 0.219259321 | 0.290109334 | 0.205939631 |
| GO:1903169 | regulation of 1/29   | 159/18723 | 0.219259321 | 0.290109334 | 0.205939631 |
| GO:0043271 | negative regu 1/29   | 160/18723 | 0.220478965 | 0.291010698 | 0.206579481 |
| GO:0060402 | calcium ion tr 1/29  | 160/18723 | 0.220478965 | 0.291010698 | 0.206579481 |
| GO:0003205 | cardiac cham 1/29    | 161/18723 | 0.22169677  | 0.29226123  | 0.207467195 |
| GO:0021953 | central nervo 1/29   | 162/18723 | 0.222912738 | 0.292793037 | 0.207844709 |
| GO:0034250 | positive regul 1/29  | 162/18723 | 0.222912738 | 0.292793037 | 0.207844709 |
| GO:0051100 | negative regu 1/29   | 162/18723 | 0.222912738 | 0.292793037 | 0.207844709 |
| GO:0006633 | fatty acid bio: 1/29 | 163/18723 | 0.224126871 | 0.293318581 | 0.208217776 |
| GO:0051494 | negative regu 1/29   | 163/18723 | 0.224126871 | 0.293318581 | 0.208217776 |
| GO:0061025 | membrane fu 1/29     | 163/18723 | 0.224126871 | 0.293318581 | 0.208217776 |
| GO:0050806 | positive regul 1/29  | 164/18723 | 0.225339173 | 0.294548544 | 0.209090889 |
| GO:0046661 | male sex diffε 1/29  | 165/18723 | 0.226549646 | 0.294705375 | 0.209202219 |
| GO:0050796 | regulation of 1/29   | 165/18723 | 0.226549646 | 0.294705375 | 0.209202219 |
| GO:0071772 | response to E 1/29   | 165/18723 | 0.226549646 | 0.294705375 | 0.209202219 |
| GO:0071773 | cellular respo 1/29  | 165/18723 | 0.226549646 | 0.294705375 | 0.209202219 |
| GO:0061013 | regulation of 1/29   | 166/18723 | 0.227758292 | 0.295921531 | 0.21006553  |
| GO:0007254 | JNK cascade 1/29     | 167/18723 | 0.228965115 | 0.296420705 | 0.210419879 |
| GO:0031960 | response to c 1/29   | 167/18723 | 0.228965115 | 0.296420705 | 0.210419879 |
| GO:1902904 | negative regu 1/29   | 167/18723 | 0.228965115 | 0.296420705 | 0.210419879 |
| GO:0000070 | mitotic sister 1/29  | 168/18723 | 0.230170116 | 0.296560067 | 0.210518807 |
| GO:0002706 | regulation of 1/29   | 168/18723 | 0.230170116 | 0.296560067 | 0.210518807 |
| GO:0002822 | regulation of 1/29   | 168/18723 | 0.230170116 | 0.296560067 | 0.210518807 |
| GO:0002833 | positive regul 1/29  | 168/18723 | 0.230170116 | 0.296560067 | 0.210518807 |
| GO:0043487 | regulation of 1/29   | 170/18723 | 0.232574667 | 0.299301447 | 0.212464828 |
| GO:0051048 | negative regu 1/29   | 171/18723 | 0.233774222 | 0.300487436 | 0.213306725 |
| GO:0000910 | cytokinesis 1/29     | 173/18723 | 0.236167902 | 0.303203684 | 0.215234905 |
| GO:0007584 | response to n 1/29   | 174/18723 | 0.237362033 | 0.304375276 | 0.216066582 |
| GO:0048771 | tissue remodel 1/29  | 175/18723 | 0.238554362 | 0.305541783 | 0.216894649 |
| GO:0071466 | cellular respo 1/29  | 177/18723 | 0.240933621 | 0.308223958 | 0.218798642 |
| GO:0035265 | organ growth 1/29    | 178/18723 | 0.242120558 | 0.309011007 | 0.219357344 |
| GO:0048015 | phosphatidyli 1/29   | 178/18723 | 0.242120558 | 0.309011007 | 0.219357344 |

|            |                  |      |           |             |             |             |
|------------|------------------|------|-----------|-------------|-------------|-------------|
| GO:0007416 | synapse assem    | 1/29 | 179/18723 | 0.243305702 | 0.309792066 | 0.219911794 |
| GO:0007626 | locomotory b     | 1/29 | 179/18723 | 0.243305702 | 0.309792066 | 0.219911794 |
| GO:0043409 | negative regul   | 1/29 | 180/18723 | 0.244489057 | 0.310567181 | 0.220462023 |
| GO:0071897 | DNA biosynth     | 1/29 | 180/18723 | 0.244489057 | 0.310567181 | 0.220462023 |
| GO:0045766 | positive regul   | 1/29 | 181/18723 | 0.245670626 | 0.310971834 | 0.220749274 |
| GO:0099504 | synaptic vesic   | 1/29 | 181/18723 | 0.245670626 | 0.310971834 | 0.220749274 |
| GO:1904018 | positive regul   | 1/29 | 181/18723 | 0.245670626 | 0.310971834 | 0.220749274 |
| GO:0048017 | inositol lipid-r | 1/29 | 182/18723 | 0.246850409 | 0.311735155 | 0.221291132 |
| GO:0060401 | cytosolic calci  | 1/29 | 182/18723 | 0.246850409 | 0.311735155 | 0.221291132 |
| GO:0002819 | regulation of    | 1/29 | 183/18723 | 0.248028412 | 0.312857308 | 0.222087714 |
| GO:0007051 | spindle organ    | 1/29 | 184/18723 | 0.249204635 | 0.313609092 | 0.222621382 |
| GO:2001257 | regulation of    | 1/29 | 184/18723 | 0.249204635 | 0.313609092 | 0.222621382 |
| GO:0007369 | gastrulation     | 1/29 | 185/18723 | 0.250379081 | 0.314720682 | 0.223410465 |
| GO:0008217 | regulation of    | 1/29 | 186/18723 | 0.251551754 | 0.315461074 | 0.223936047 |
| GO:0120032 | regulation of    | 1/29 | 186/18723 | 0.251551754 | 0.315461074 | 0.223936047 |
| GO:0033044 | regulation of    | 1/29 | 187/18723 | 0.252722655 | 0.316562214 | 0.224717711 |
| GO:0001906 | cell killing     | 1/29 | 188/18723 | 0.253891788 | 0.317291356 | 0.225235307 |
| GO:0060491 | regulation of    | 1/29 | 188/18723 | 0.253891788 | 0.317291356 | 0.225235307 |
| GO:0051216 | cartilage devel  | 1/29 | 190/18723 | 0.256224757 | 0.319837139 | 0.22704248  |
| GO:0032872 | regulation of    | 1/29 | 192/18723 | 0.258550683 | 0.322368268 | 0.228839249 |
| GO:0030073 | insulin secret   | 1/29 | 195/18723 | 0.262026408 | 0.325575342 | 0.231115852 |
| GO:0070302 | regulation of    | 1/29 | 195/18723 | 0.262026408 | 0.325575342 | 0.231115852 |
| GO:1901605 | alpha-amino acid | 1/29 | 195/18723 | 0.262026408 | 0.325575342 | 0.231115852 |
| GO:0071674 | mononuclear      | 1/29 | 196/18723 | 0.263181483 | 0.326260531 | 0.231602247 |
| GO:0090276 | regulation of    | 1/29 | 196/18723 | 0.263181483 | 0.326260531 | 0.231602247 |
| GO:0007179 | transforming     | 1/29 | 198/18723 | 0.265486399 | 0.328364757 | 0.233095971 |
| GO:0048167 | regulation of    | 1/29 | 198/18723 | 0.265486399 | 0.328364757 | 0.233095971 |
| GO:0002791 | regulation of    | 1/29 | 200/18723 | 0.267784353 | 0.330450783 | 0.234576776 |
| GO:0099003 | vesicle-media    | 1/29 | 200/18723 | 0.267784353 | 0.330450783 | 0.234576776 |
| GO:0051054 | positive regul   | 1/29 | 201/18723 | 0.268930725 | 0.331010736 | 0.23497427  |
| GO:0065004 | protein-DNA int  | 1/29 | 201/18723 | 0.268930725 | 0.331010736 | 0.23497427  |
| GO:0000819 | sister chroma    | 1/29 | 202/18723 | 0.270075365 | 0.331010736 | 0.23497427  |
| GO:0009913 | epidermal cell   | 1/29 | 202/18723 | 0.270075365 | 0.331010736 | 0.23497427  |
| GO:0017157 | regulation of    | 1/29 | 202/18723 | 0.270075365 | 0.331010736 | 0.23497427  |
| GO:0090087 | regulation of    | 1/29 | 202/18723 | 0.270075365 | 0.331010736 | 0.23497427  |
| GO:0060348 | bone develop     | 1/29 | 205/18723 | 0.27349891  | 0.334827091 | 0.237683382 |
| GO:0008016 | regulation of    | 1/29 | 206/18723 | 0.274636642 | 0.335460125 | 0.238132753 |
| GO:0048863 | stem cell diff   | 1/29 | 206/18723 | 0.274636642 | 0.335460125 | 0.238132753 |
| GO:0006836 | neurotransmi     | 1/29 | 208/18723 | 0.276906949 | 0.33785148  | 0.239830303 |
| GO:0071222 | cellular respo   | 1/29 | 209/18723 | 0.278039528 | 0.338850879 | 0.240539744 |
| GO:0002685 | regulation of    | 1/29 | 210/18723 | 0.279170394 | 0.339463662 | 0.24097474  |
| GO:0007623 | circadian rhyt   | 1/29 | 210/18723 | 0.279170394 | 0.339463662 | 0.24097474  |
| GO:0030100 | regulation of    | 1/29 | 211/18723 | 0.280299549 | 0.340071619 | 0.24140631  |
| GO:0050807 | regulation of    | 1/29 | 211/18723 | 0.280299549 | 0.340071619 | 0.24140631  |
| GO:0001505 | regulation of    | 1/29 | 213/18723 | 0.282552739 | 0.342420977 | 0.243074047 |
| GO:0051651 | maintenance      | 1/29 | 214/18723 | 0.283676779 | 0.343014092 | 0.24349508  |
| GO:0072330 | monocarboxy      | 1/29 | 214/18723 | 0.283676779 | 0.343014092 | 0.24349508  |
| GO:0007601 | visual percep    | 1/29 | 215/18723 | 0.284799118 | 0.343986421 | 0.244185307 |
| GO:0009612 | response to n    | 1/29 | 216/18723 | 0.285919759 | 0.344954531 | 0.244872538 |
| GO:0070374 | positive regul   | 1/29 | 217/18723 | 0.287038705 | 0.345918439 | 0.245556787 |

|            |                       |           |             |             |             |
|------------|-----------------------|-----------|-------------|-------------|-------------|
| GO:0050803 | regulation of 1/29    | 218/18723 | 0.288155957 | 0.346878163 | 0.246238065 |
| GO:0050953 | sensory perce 1/29    | 219/18723 | 0.28927152  | 0.347833718 | 0.246916384 |
| GO:0002064 | epithelial cell 1/29  | 220/18723 | 0.290385394 | 0.348011763 | 0.247042773 |
| GO:0048705 | skeletal syste 1/29   | 220/18723 | 0.290385394 | 0.348011763 | 0.247042773 |
| GO:0097529 | myeloid leuko 1/29    | 220/18723 | 0.290385394 | 0.348011763 | 0.247042773 |
| GO:0008406 | gonad develo 1/29     | 221/18723 | 0.291497582 | 0.348186615 | 0.247166894 |
| GO:0010810 | regulation of 1/29    | 221/18723 | 0.291497582 | 0.348186615 | 0.247166894 |
| GO:0071219 | cellular respo 1/29   | 221/18723 | 0.291497582 | 0.348186615 | 0.247166894 |
| GO:0050920 | regulation of 1/29    | 223/18723 | 0.293716912 | 0.350450311 | 0.248773822 |
| GO:0010001 | glial cell diffe 1/29 | 225/18723 | 0.295929529 | 0.352701016 | 0.250371528 |
| GO:0002703 | regulation of 1/29    | 226/18723 | 0.297033327 | 0.353626681 | 0.251028629 |
| GO:0045137 | development 1/29      | 227/18723 | 0.298135453 | 0.35376995  | 0.251130331 |
| GO:0046777 | protein autoo 1/29    | 227/18723 | 0.298135453 | 0.35376995  | 0.251130331 |
| GO:0098657 | import into c 1/29    | 227/18723 | 0.298135453 | 0.35376995  | 0.251130331 |
| GO:0001649 | osteoblast dif 1/29   | 229/18723 | 0.300334703 | 0.355988831 | 0.252705446 |
| GO:0030595 | leukocyte che 1/29    | 230/18723 | 0.301431832 | 0.356507451 | 0.253073598 |
| GO:0045055 | regulated exc 1/29    | 230/18723 | 0.301431832 | 0.356507451 | 0.253073598 |
| GO:0006402 | mRNA catabo 1/29      | 232/18723 | 0.303621108 | 0.358312683 | 0.254355076 |
| GO:0010594 | regulation of 1/29    | 232/18723 | 0.303621108 | 0.358312683 | 0.254355076 |
| GO:0007188 | adenylate cyc 1/29    | 233/18723 | 0.30471326  | 0.35881812  | 0.25471387  |
| GO:0032271 | regulation of 1/29    | 233/18723 | 0.30471326  | 0.35881812  | 0.25471387  |
| GO:0060560 | development 1/29      | 234/18723 | 0.305803758 | 0.359710405 | 0.255347276 |
| GO:0002699 | positive regul 1/29   | 235/18723 | 0.306892605 | 0.360598811 | 0.255977928 |
| GO:0030072 | peptide horm 1/29     | 236/18723 | 0.307979803 | 0.360700073 | 0.256049811 |
| GO:0048738 | cardiac muscl 1/29    | 236/18723 | 0.307979803 | 0.360700073 | 0.256049811 |
| GO:0090068 | positive regul 1/29   | 236/18723 | 0.307979803 | 0.360700073 | 0.256049811 |
| GO:0019318 | hexose metal 1/29     | 237/18723 | 0.309065354 | 0.361188809 | 0.256396749 |
| GO:1901617 | organic hydrc 1/29    | 237/18723 | 0.309065354 | 0.361188809 | 0.256396749 |
| GO:0051403 | stress-activat 1/29   | 239/18723 | 0.311231526 | 0.363327516 | 0.257914951 |
| GO:0032886 | regulation of 1/29    | 240/18723 | 0.312312152 | 0.364195724 | 0.258531265 |
| GO:0006813 | potassium ior 1/29    | 241/18723 | 0.313391141 | 0.364275079 | 0.258587597 |
| GO:0060047 | heart contrac 1/29    | 241/18723 | 0.313391141 | 0.364275079 | 0.258587597 |
| GO:0071824 | protein-DNA 1/29      | 241/18723 | 0.313391141 | 0.364275079 | 0.258587597 |
| GO:0002790 | peptide secre 1/29    | 242/18723 | 0.314468495 | 0.36513474  | 0.259197844 |
| GO:0043543 | protein acylat 1/29   | 243/18723 | 0.315544217 | 0.365990663 | 0.259805437 |
| GO:0006898 | receptor-mec 1/29     | 244/18723 | 0.316618308 | 0.366842863 | 0.260410387 |
| GO:0006814 | sodium ion tr 1/29    | 245/18723 | 0.317690773 | 0.367298102 | 0.260733547 |
| GO:0017148 | negative regu 1/29    | 245/18723 | 0.317690773 | 0.367298102 | 0.260733547 |
| GO:0003007 | heart morpho 1/29     | 246/18723 | 0.318761612 | 0.367749523 | 0.261053997 |
| GO:0071216 | cellular respo 1/29   | 246/18723 | 0.318761612 | 0.367749523 | 0.261053997 |
| GO:0031098 | stress-activat 1/29   | 247/18723 | 0.319830829 | 0.368589686 | 0.261650403 |
| GO:0021537 | telencephalo 1/29     | 248/18723 | 0.320898425 | 0.369033188 | 0.261965231 |
| GO:0033002 | muscle cell pr 1/29   | 248/18723 | 0.320898425 | 0.369033188 | 0.261965231 |
| GO:0046883 | regulation of 1/29    | 249/18723 | 0.321964403 | 0.369865589 | 0.262556127 |
| GO:0071560 | cellular respo 1/29   | 250/18723 | 0.323028765 | 0.370694369 | 0.263144452 |
| GO:0003015 | heart process 1/29    | 251/18723 | 0.324091514 | 0.371519541 | 0.263730216 |
| GO:0061448 | connective tis 1/29   | 252/18723 | 0.325152653 | 0.37234112  | 0.26431343  |
| GO:0007611 | learning or m 1/29    | 255/18723 | 0.328326426 | 0.375180619 | 0.266329102 |
| GO:0051924 | regulation of 1/29    | 255/18723 | 0.328326426 | 0.375180619 | 0.266329102 |
| GO:0071559 | response to t 1/29    | 256/18723 | 0.329381144 | 0.375196013 | 0.26634003  |

|            |                 |      |           |             |             |             |
|------------|-----------------|------|-----------|-------------|-------------|-------------|
| GO:0090092 | regulation of   | 1/29 | 256/18723 | 0.329381144 | 0.375196013 | 0.26634003  |
| GO:1903522 | regulation of   | 1/29 | 256/18723 | 0.329381144 | 0.375196013 | 0.26634003  |
| GO:0005996 | monosacchar     | 1/29 | 257/18723 | 0.330434263 | 0.375999408 | 0.266910335 |
| GO:0051321 | meiotic cell c  | 1/29 | 261/18723 | 0.334630793 | 0.380374224 | 0.270015881 |
| GO:0043588 | skin developr   | 1/29 | 263/18723 | 0.336719524 | 0.382346434 | 0.271415892 |
| GO:0015833 | peptide trans   | 1/29 | 264/18723 | 0.337761514 | 0.383127174 | 0.271970115 |
| GO:0032412 | regulation of   | 1/29 | 267/18723 | 0.340878009 | 0.386256948 | 0.274191845 |
| GO:0001894 | tissue homeo    | 1/29 | 268/18723 | 0.341913691 | 0.386619979 | 0.274449549 |
| GO:0050708 | regulation of   | 1/29 | 268/18723 | 0.341913691 | 0.386619979 | 0.274449549 |
| GO:0034249 | negative regu   | 1/29 | 273/18723 | 0.347068574 | 0.391221198 | 0.277715812 |
| GO:0046942 | carboxylic aci  | 1/29 | 273/18723 | 0.347068574 | 0.391221198 | 0.277715812 |
| GO:0098742 | cell-cell adhe: | 1/29 | 273/18723 | 0.347068574 | 0.391221198 | 0.277715812 |
| GO:0043270 | positive regul  | 1/29 | 275/18723 | 0.349119592 | 0.393123208 | 0.27906599  |
| GO:0046034 | ATP metaboli    | 1/29 | 277/18723 | 0.351164389 | 0.39492884  | 0.280347752 |
| GO:0006401 | RNA catabolic   | 1/29 | 278/18723 | 0.35218446  | 0.39492884  | 0.280347752 |
| GO:0022898 | regulation of   | 1/29 | 278/18723 | 0.35218446  | 0.39492884  | 0.280347752 |
| GO:0031349 | positive regul  | 1/29 | 278/18723 | 0.35218446  | 0.39492884  | 0.280347752 |
| GO:0043542 | endothelial c   | 1/29 | 279/18723 | 0.353202983 | 0.395660544 | 0.280867166 |
| GO:0006470 | protein deph    | 1/29 | 281/18723 | 0.355235392 | 0.397114228 | 0.281899092 |
| GO:0098813 | nuclear chror   | 1/29 | 281/18723 | 0.355235392 | 0.397114228 | 0.281899092 |
| GO:1903532 | positive regul  | 1/29 | 282/18723 | 0.356249283 | 0.397836234 | 0.282411621 |
| GO:0051146 | striated musc   | 1/29 | 283/18723 | 0.357261634 | 0.398449091 | 0.28284667  |
| GO:0006520 | cellular aminc  | 1/29 | 284/18723 | 0.358272448 | 0.398449091 | 0.28284667  |
| GO:0015850 | organic hydrc   | 1/29 | 284/18723 | 0.358272448 | 0.398449091 | 0.28284667  |
| GO:0022409 | positive regul  | 1/29 | 284/18723 | 0.358272448 | 0.398449091 | 0.28284667  |
| GO:0140014 | mitotic nucle:  | 1/29 | 287/18723 | 0.36129569  | 0.401398398 | 0.284940291 |
| GO:1903311 | regulation of   | 1/29 | 288/18723 | 0.362300378 | 0.402101343 | 0.28543929  |
| GO:0002429 | immune resp     | 1/29 | 291/18723 | 0.365305294 | 0.404191426 | 0.286922975 |
| GO:0002757 | immune resp     | 1/29 | 291/18723 | 0.365305294 | 0.404191426 | 0.286922975 |
| GO:0016236 | macroautoph     | 1/29 | 291/18723 | 0.365305294 | 0.404191426 | 0.286922975 |
| GO:0010632 | regulation of   | 1/29 | 292/18723 | 0.366303892 | 0.404881909 | 0.287413128 |
| GO:0001822 | kidney develc   | 1/29 | 293/18723 | 0.367300972 | 0.405569306 | 0.28790109  |
| GO:0010948 | negative regu   | 1/29 | 294/18723 | 0.368296538 | 0.40625363  | 0.28838687  |
| GO:0046879 | hormone secr    | 1/29 | 295/18723 | 0.36929059  | 0.406934891 | 0.288870476 |
| GO:0050890 | cognition       | 1/29 | 296/18723 | 0.370283133 | 0.407613103 | 0.289351918 |
| GO:0051258 | protein polyn   | 1/29 | 297/18723 | 0.371274167 | 0.408288275 | 0.289831202 |
| GO:0048511 | rhythmic pro    | 1/29 | 298/18723 | 0.372263696 | 0.408960422 | 0.290308338 |
| GO:0016050 | vesicle organi  | 1/29 | 300/18723 | 0.374238243 | 0.410542866 | 0.291431666 |
| GO:0030198 | extracellular   | 1/29 | 301/18723 | 0.375223267 | 0.410542866 | 0.291431666 |
| GO:0042063 | gliogenesis     | 1/29 | 301/18723 | 0.375223267 | 0.410542866 | 0.291431666 |
| GO:0042886 | amide transp    | 1/29 | 301/18723 | 0.375223267 | 0.410542866 | 0.291431666 |
| GO:0043062 | extracellular   | 1/29 | 302/18723 | 0.376206793 | 0.410787418 | 0.291605266 |
| GO:0072001 | renal system    | 1/29 | 302/18723 | 0.376206793 | 0.410787418 | 0.291605266 |
| GO:0015849 | organic acid t  | 1/29 | 303/18723 | 0.377188825 | 0.411029354 | 0.291777009 |
| GO:0060070 | canonical Wn    | 1/29 | 303/18723 | 0.377188825 | 0.411029354 | 0.291777009 |
| GO:0045229 | external enca   | 1/29 | 304/18723 | 0.378169364 | 0.411682862 | 0.292240914 |
| GO:0009914 | hormone trar    | 1/29 | 306/18723 | 0.380125972 | 0.413396555 | 0.293457411 |
| GO:0032409 | regulation of   | 1/29 | 310/18723 | 0.38402137  | 0.416794278 | 0.29586935  |
| GO:0051047 | positive regul  | 1/29 | 310/18723 | 0.38402137  | 0.416794278 | 0.29586935  |
| GO:0070588 | calcium ion tr  | 1/29 | 312/18723 | 0.385960196 | 0.418478407 | 0.297064861 |

|            |                 |      |           |             |             |             |
|------------|-----------------|------|-----------|-------------|-------------|-------------|
| GO:0045787 | positive regul  | 1/29 | 313/18723 | 0.386927398 | 0.41910673  | 0.297510888 |
| GO:0046394 | carboxylic aci  | 1/29 | 314/18723 | 0.387893129 | 0.419312472 | 0.297656938 |
| GO:0060249 | anatomical st   | 1/29 | 314/18723 | 0.387893129 | 0.419312472 | 0.297656938 |
| GO:0002768 | immune resp     | 1/29 | 315/18723 | 0.388857391 | 0.419934904 | 0.298098783 |
| GO:0016053 | organic acid k  | 1/29 | 316/18723 | 0.389820186 | 0.420135215 | 0.298240978 |
| GO:0043414 | macromolecu     | 1/29 | 316/18723 | 0.389820186 | 0.420135215 | 0.298240978 |
| GO:0051235 | maintenance     | 1/29 | 327/18723 | 0.400314744 | 0.431016173 | 0.305965033 |
| GO:0003002 | regionalizatio  | 1/29 | 331/18723 | 0.404087565 | 0.434645431 | 0.30854133  |
| GO:0001655 | urogenital sys  | 1/29 | 338/18723 | 0.410634925 | 0.440932908 | 0.313004615 |
| GO:0002697 | regulation of   | 1/29 | 339/18723 | 0.411564574 | 0.440932908 | 0.313004615 |
| GO:0007568 | aging           | 1/29 | 339/18723 | 0.411564574 | 0.440932908 | 0.313004615 |
| GO:0048545 | response to s   | 1/29 | 339/18723 | 0.411564574 | 0.440932908 | 0.313004615 |
| GO:0032496 | response to li  | 1/29 | 343/18723 | 0.415269029 | 0.444461208 | 0.315509247 |
| GO:0007059 | chromosome      | 1/29 | 346/18723 | 0.418032584 | 0.446976482 | 0.317294761 |
| GO:0006936 | muscle contr    | 1/29 | 347/18723 | 0.418950963 | 0.447515801 | 0.317677608 |
| GO:0010639 | negative regu   | 1/29 | 348/18723 | 0.419867943 | 0.448052563 | 0.318058638 |
| GO:0002449 | lymphocyte n    | 1/29 | 350/18723 | 0.421697713 | 0.449118451 | 0.318815279 |
| GO:0042742 | defense resp    | 1/29 | 350/18723 | 0.421697713 | 0.449118451 | 0.318815279 |
| GO:0006887 | exocytosis      | 1/29 | 352/18723 | 0.42352191  | 0.450617307 | 0.319879271 |
| GO:0015711 | organic anion   | 1/29 | 354/18723 | 0.42534055  | 0.452107311 | 0.320936978 |
| GO:0007178 | transmembra     | 1/29 | 355/18723 | 0.426247792 | 0.452626585 | 0.321305594 |
| GO:0010631 | epithelial cell | 1/29 | 357/18723 | 0.428058129 | 0.453657683 | 0.32203754  |
| GO:1904062 | regulation of   | 1/29 | 357/18723 | 0.428058129 | 0.453657683 | 0.32203754  |
| GO:0009306 | protein secre   | 1/29 | 359/18723 | 0.42986295  | 0.454678912 | 0.322762478 |
| GO:0051052 | regulation of   | 1/29 | 359/18723 | 0.42986295  | 0.454678912 | 0.322762478 |
| GO:0035592 | establishmen    | 1/29 | 360/18723 | 0.430763297 | 0.454741332 | 0.322806788 |
| GO:0090132 | epithelium m    | 1/29 | 360/18723 | 0.430763297 | 0.454741332 | 0.322806788 |
| GO:0002237 | response to n   | 1/29 | 363/18723 | 0.433456109 | 0.457137613 | 0.324507834 |
| GO:0032259 | methylation     | 1/29 | 364/18723 | 0.434350977 | 0.457634899 | 0.324860841 |
| GO:0090130 | tissue migrati  | 1/29 | 365/18723 | 0.43524448  | 0.458129779 | 0.325212141 |
| GO:0140694 | non-membra      | 1/29 | 367/18723 | 0.437027399 | 0.459558968 | 0.326226678 |
| GO:0009150 | purine ribonu   | 1/29 | 368/18723 | 0.43791682  | 0.45960008  | 0.326255863 |
| GO:0071692 | protein locali  | 1/29 | 368/18723 | 0.43791682  | 0.45960008  | 0.326255863 |
| GO:0050900 | leukocyte mi    | 1/29 | 369/18723 | 0.438804884 | 0.460085431 | 0.326600399 |
| GO:0002253 | activation of   | 1/29 | 375/18723 | 0.444104886 | 0.465191262 | 0.330224869 |
| GO:0050878 | regulation of   | 1/29 | 379/18723 | 0.447611337 | 0.468410315 | 0.332509976 |
| GO:0006644 | phospholipid    | 1/29 | 383/18723 | 0.451096428 | 0.47023085  | 0.333802317 |
| GO:0032535 | regulation of   | 1/29 | 383/18723 | 0.451096428 | 0.47023085  | 0.333802317 |
| GO:1902903 | regulation of   | 1/29 | 383/18723 | 0.451096428 | 0.47023085  | 0.333802317 |
| GO:0014706 | striated musc   | 1/29 | 384/18723 | 0.451964378 | 0.47023085  | 0.333802317 |
| GO:0022412 | cellular proce  | 1/29 | 384/18723 | 0.451964378 | 0.47023085  | 0.333802317 |
| GO:0042692 | muscle cell di  | 1/29 | 384/18723 | 0.451964378 | 0.47023085  | 0.333802317 |
| GO:0009259 | ribonucleotid   | 1/29 | 385/18723 | 0.452831003 | 0.47023085  | 0.333802317 |
| GO:0045786 | negative regu   | 1/29 | 385/18723 | 0.452831003 | 0.47023085  | 0.333802317 |
| GO:0045860 | positive regul  | 1/29 | 386/18723 | 0.453696305 | 0.47067726  | 0.33411921  |
| GO:0006163 | purine nuclec   | 1/29 | 396/18723 | 0.46227697  | 0.478660349 | 0.339786158 |
| GO:0019693 | ribose phospl   | 1/29 | 396/18723 | 0.46227697  | 0.478660349 | 0.339786158 |
| GO:0006869 | lipid transpor  | 1/29 | 398/18723 | 0.463977418 | 0.479961329 | 0.340709683 |
| GO:0060537 | muscle tissue   | 1/29 | 403/18723 | 0.468205854 | 0.483872398 | 0.34348603  |
| GO:0010959 | regulation of   | 1/29 | 406/18723 | 0.470727438 | 0.486013716 | 0.345006085 |

|            |                  |      |           |             |             |             |
|------------|------------------|------|-----------|-------------|-------------|-------------|
| GO:0034655 | nucleobase-c     | 1/29 | 407/18723 | 0.471565397 | 0.486414308 | 0.345290453 |
| GO:0006325 | chromatin org    | 1/29 | 409/18723 | 0.473237475 | 0.487673699 | 0.346184456 |
| GO:0072521 | purine-contai    | 1/29 | 416/18723 | 0.479049614 | 0.493192983 | 0.350102424 |
| GO:0016311 | dephosphory      | 1/29 | 417/18723 | 0.479874848 | 0.493572512 | 0.35037184  |
| GO:0007409 | axonogenesis     | 1/29 | 418/18723 | 0.48069882  | 0.493950023 | 0.350639824 |
| GO:0006816 | calcium ion tr   | 1/29 | 422/18723 | 0.483982122 | 0.496851542 | 0.352699522 |
| GO:0031331 | positive regul   | 1/29 | 427/18723 | 0.488058072 | 0.500560509 | 0.355332403 |
| GO:0042391 | regulation of    | 1/29 | 434/18723 | 0.493712217 | 0.505879532 | 0.359108212 |
| GO:0007389 | pattern speci    | 1/29 | 436/18723 | 0.495316581 | 0.507042825 | 0.359933998 |
| GO:0000280 | nuclear divisi   | 1/29 | 439/18723 | 0.497713926 | 0.508386748 | 0.360888008 |
| GO:0050804 | modulation o     | 1/29 | 439/18723 | 0.497713926 | 0.508386748 | 0.360888008 |
| GO:0002443 | leukocyte me     | 1/29 | 440/18723 | 0.498510595 | 0.508386748 | 0.360888008 |
| GO:0099177 | regulation of    | 1/29 | 440/18723 | 0.498510595 | 0.508386748 | 0.360888008 |
| GO:0046700 | heterocycle c    | 1/29 | 445/18723 | 0.502475675 | 0.511947412 | 0.363415613 |
| GO:0010876 | lipid localizati | 1/29 | 448/18723 | 0.504840175 | 0.513388739 | 0.364438766 |
| GO:0022407 | regulation of    | 1/29 | 448/18723 | 0.504840175 | 0.513388739 | 0.364438766 |
| GO:0044270 | cellular nitro   | 1/29 | 451/18723 | 0.507193824 | 0.515297485 | 0.365793725 |
| GO:0007608 | sensory perce    | 1/29 | 456/18723 | 0.511092588 | 0.518770974 | 0.368259448 |
| GO:0007346 | regulation of    | 1/29 | 457/18723 | 0.511868758 | 0.519071415 | 0.368472721 |
| GO:0023061 | signal release   | 1/29 | 463/18723 | 0.51650086  | 0.523277816 | 0.371458715 |
| GO:0019439 | aromatic corr    | 1/29 | 467/18723 | 0.519565319 | 0.524906644 | 0.37261497  |
| GO:0033674 | positive regul   | 1/29 | 467/18723 | 0.519565319 | 0.524906644 | 0.37261497  |
| GO:0061564 | axon develop     | 1/29 | 467/18723 | 0.519565319 | 0.524906644 | 0.37261497  |
| GO:0002764 | immune resp      | 1/29 | 468/18723 | 0.520328498 | 0.525186841 | 0.372813873 |
| GO:0051051 | negative regu    | 1/29 | 470/18723 | 0.521851347 | 0.526232562 | 0.373556198 |
| GO:0019221 | cytokine-mec     | 1/29 | 472/18723 | 0.523369528 | 0.527271631 | 0.374293801 |
| GO:0031667 | response to n    | 1/29 | 474/18723 | 0.524883054 | 0.528304079 | 0.375026704 |
| GO:0048285 | organelle fiss   | 1/29 | 488/18723 | 0.535348554 | 0.538336546 | 0.382148442 |
| GO:0009117 | nucleotide m     | 1/29 | 489/18723 | 0.536087512 | 0.538578625 | 0.382320286 |
| GO:0006091 | generation of    | 1/29 | 490/18723 | 0.536825335 | 0.538819115 | 0.382491002 |
| GO:0034765 | regulation of    | 1/29 | 491/18723 | 0.537562025 | 0.539058023 | 0.382660596 |
| GO:0009896 | positive regul   | 1/29 | 492/18723 | 0.538297583 | 0.539295354 | 0.38282907  |
| GO:1901361 | organic cyclic   | 1/29 | 495/18723 | 0.540497487 | 0.540997948 | 0.384037688 |
| GO:0006753 | nucleoside ph    | 1/29 | 497/18723 | 0.541958463 | 0.541958463 | 0.384719528 |

## Supplementary table 2

| ID         | Description    | GeneRatio | BgRatio   | pvalue      | p.adjust    | qvalue      |
|------------|----------------|-----------|-----------|-------------|-------------|-------------|
| GO:0002052 | positive regul | 2/29      | 23/18723  | 0.000574358 | 0.128113766 | 0.090943995 |
| GO:0019730 | antimicrobial  | 3月29日     | 122/18723 | 0.000871494 | 0.128113766 | 0.090943995 |
| GO:1902692 | regulation of  | 2/29      | 33/18723  | 0.001187209 | 0.128113766 | 0.090943995 |
| GO:0060428 | lung epitheliu | 2/29      | 37/18723  | 0.001491766 | 0.128113766 | 0.090943995 |
| GO:0002920 | regulation of  | 2/29      | 45/18723  | 0.002200544 | 0.128113766 | 0.090943995 |
| GO:2000179 | positive regul | 2/29      | 54/18723  | 0.003153471 | 0.128113766 | 0.090943995 |
| GO:0042220 | response to c  | 2/29      | 55/18723  | 0.003269337 | 0.128113766 | 0.090943995 |
| GO:0051898 | negative regu  | 2/29      | 55/18723  | 0.003269337 | 0.128113766 | 0.090943995 |
| GO:0007405 | neuroblast pr  | 2/29      | 58/18723  | 0.00362876  | 0.128113766 | 0.090943995 |
| GO:0034329 | cell junction  | 4月29日     | 420/18723 | 0.003802407 | 0.128113766 | 0.090943995 |
| GO:0006500 | N-terminal pr  | 1月29日     | 3/18723   | 0.004639745 | 0.128113766 | 0.090943995 |
| GO:0021769 | orbitofrontal  | 1月29日     | 3/18723   | 0.004639745 | 0.128113766 | 0.090943995 |

| geneID        | Count |
|---------------|-------|
| DRD2/DCT      | 2     |
| CXCL13/CXCL   | 3     |
| DRD2/DCT      | 2     |
| WNT7B/GAT4    | 2     |
| CXCL13/GAT4   | 2     |
| DRD2/DCT      | 2     |
| DRD2/DNMT3A   | 2     |
| DRD2/CRYBA    | 2     |
| DRD2/DCT      | 2     |
| MPP7/ARHGAP25 | 4     |
| HHAT          | 1     |
| DRD2          | 1     |
| NEK2          | 1     |
| DRD2          | 1     |
| WNT7B         | 1     |
| WNT7B         | 1     |
| DRD2          | 1     |
| DRD2          | 1     |
| SCD           | 1     |
| MPP7/CLDN7    | 2     |
| CYP2U1/GAT4   | 4     |
| KLRD1/DRD2    | 2     |
| MPP7/CLDN7    | 2     |
| WNT7B         | 1     |
| DRD2          | 1     |
| GATA6         | 1     |
| WNT7B         | 1     |
| DNMT3A        | 1     |
| DRD2          | 1     |
| GATA6         | 1     |
| CXCL13        | 1     |
| MPP7/CLDN7    | 2     |
| CXCL13/CXCL   | 2     |
| MPP7/CLDN7    | 2     |
| WNT7B/CRYE    | 2     |
| ALDOB         | 1     |
| DCT           | 1     |
| DCT           | 1     |
| DRD2          | 1     |
| DRD2          | 1     |
| GATA6         | 1     |
| CXCL13        | 1     |
| DRD2/DCT      | 2     |
| FGF5/DRD2     | 2     |

|             |   |
|-------------|---|
| DRD2        | 1 |
| DRD2        | 1 |
| DRD2        | 1 |
| DNMT3A      | 1 |
| GATA6       | 1 |
| CXCL13      | 1 |
| GATA6       | 1 |
| WNT7B       | 1 |
| ALDOB       | 1 |
| MPP7        | 1 |
| DRD2/DCT    | 2 |
| ARHGEF7/DR  | 3 |
| GATA6       | 1 |
| HHAT        | 1 |
| DCT         | 1 |
| DRD2        | 1 |
| WNT7B       | 1 |
| WNT7B       | 1 |
| GATA6       | 1 |
| GATA6       | 1 |
| DRD2        | 1 |
| CRYBA1      | 1 |
| ARHGEF7     | 1 |
| CXCL13      | 1 |
| GATA6/DRD2  | 3 |
| WNT7B/GAT/  | 2 |
| KLRD1/DRD2  | 2 |
| GATA6       | 1 |
| WNT7B       | 1 |
| CXCL13      | 1 |
| DNMT3A      | 1 |
| DRD2        | 1 |
| DRD2        | 1 |
| DRD2        | 1 |
| GATA6       | 1 |
| DRD2        | 1 |
| DRD2        | 1 |
| PLEKHM1     | 1 |
| ALDOB       | 1 |
| GATA6       | 1 |
| DNMT3A      | 1 |
| DRD2        | 1 |
| DRD2/DCT    | 2 |
| CXCL13/CXCL | 3 |
| CXCL13/FGF5 | 2 |
| GATA6/DRD2  | 3 |
| WNT7B/DRD:  | 3 |
| DRD2/DNMT:  | 2 |
| KLRD1/GATA/ | 3 |
| CYP2U1/SCD  | 2 |



|             |   |
|-------------|---|
| DRD2        | 1 |
| GATA6       | 1 |
| GATA6       | 1 |
| NEK2        | 1 |
| GATA6       | 1 |
| DRD2        | 1 |
| DRD2        | 1 |
| GATA6       | 1 |
| WNT7B       | 1 |
| CYP2U1      | 1 |
| PLEKHM1     | 1 |
| CXCL13/FGF5 | 2 |
| KLRD1       | 1 |
| ARHGEF7     | 1 |
| ALDOB       | 1 |
| CXCL13      | 1 |
| GATA6       | 1 |
| DRD2        | 1 |
| DRD2        | 1 |
| WNT7B       | 1 |
| GATA6       | 1 |
| GATA6       | 1 |
| WNT7B       | 1 |
| GATA6       | 1 |
| CXCL13      | 1 |
| GATA6/DRD2  | 3 |
| GATA6/DRD2  | 2 |
| GATA6       | 1 |
| DRD2        | 1 |
| DRD2        | 1 |
| DRD2        | 1 |
| WNT7B       | 1 |
| CXCL13      | 1 |
| CXCL13      | 1 |
| DRD2        | 1 |
| CXCL13      | 1 |
| DRD2        | 1 |
| WNT7B       | 1 |
| WNT7B       | 1 |
| CXCL13      | 1 |
| ARHGEF7     | 1 |
| DRD2        | 1 |
| DRD2        | 1 |
| WNT7B       | 1 |
| GATA6       | 1 |
| DRD2        | 1 |
| DRD2        | 1 |

|            |   |
|------------|---|
| DRD2       | 1 |
| DRD2       | 1 |
| SNX25      | 1 |
| GATA6      | 1 |
| WNT7B/NEK2 | 3 |
| DRD2/DNMT: | 2 |
| WNT7B/DRD: | 3 |
| WNT7B/DRD: | 3 |
| ALDOB      | 1 |
| DRD2       | 1 |
| GATA6      | 1 |
| GATA6      | 1 |
| DRD2       | 1 |
| NEK2       | 1 |
| TNRC6C     | 1 |
| DRD2       | 1 |
| WNT7B/DRD: | 3 |
| WNT7B/DRD: | 3 |
| PLAC1/WNT7 | 2 |
| DRD2/DCT   | 2 |
| MPP7/CLDN7 | 2 |
| GATA6      | 1 |
| CXCL13     | 1 |
| NEK2       | 1 |
| DRD2       | 1 |
| NEK2       | 1 |
| ARHGEF7    | 1 |
| DRD2       | 1 |
| DCT        | 1 |
| WNT7B      | 1 |
| GATA6/DNM  | 2 |
| DCT        | 1 |
| ARHGEF7    | 1 |
| CXCL13     | 1 |
| DRD2       | 1 |
| DRD2       | 1 |
| NEK2       | 1 |
| TNRC6C     | 1 |
| ALDOB      | 1 |
| WNT7B      | 1 |
| DRD2       | 1 |
| PLEKHM1    | 1 |
| TNRC6C     | 1 |
| ARHGEF7    | 1 |
| DNMT3A     | 1 |
| CXCL13     | 1 |
| CXCL13     | 1 |

|             |   |
|-------------|---|
| DNMT3A      | 1 |
| DNMT3A      | 1 |
| GATA6/DNM   | 2 |
| DRD2        | 1 |
| DRD2        | 1 |
| DRD2        | 1 |
| COL13A1     | 1 |
| CXCL13      | 1 |
| DRD2        | 1 |
| DRD2        | 1 |
| DRD2        | 1 |
| GATA6       | 1 |
| ARHGEF7     | 1 |
| DRD2        | 1 |
| NEK2        | 1 |
| CXCL13/KLRD | 3 |
| SNX25/DRD2  | 2 |
| PLAC1/WNT7  | 3 |
| KLRD1       | 1 |
| CXCL13      | 1 |
| DNMT3A      | 1 |
| DRD2        | 1 |
| KLRD1       | 1 |
| WNT7B       | 1 |
| WNT7B       | 1 |
| DRD2        | 1 |
| TNRC6C      | 1 |
| KLRD1       | 1 |
| KLRD1       | 1 |
| PLAC1/WNT7  | 3 |
| MPP7/CXCL1  | 3 |
| KLRD1       | 1 |
| GATA6       | 1 |
| CRYBA1      | 1 |
| PLEKHM1     | 1 |
| CXCL13      | 1 |
| GATA6       | 1 |
| WNT7B/GAT/  | 3 |
| SCD/DRD2    | 2 |
| GATA6/DRD2  | 2 |
| WNT7B/GAT/  | 2 |
| FGF5/DRD2   | 2 |
| GATA6/DNM   | 2 |
| DNMT3A      | 1 |
| DRD2        | 1 |
| DNMT3A      | 1 |
| DRD2        | 1 |
| WNT7B/GAT/  | 2 |
| FGF5        | 1 |
| CXCL13      | 1 |

|            |   |
|------------|---|
| DRD2       | 1 |
| DRD2       | 1 |
| WNT7B      | 1 |
| WNT7B      | 1 |
| MPP7       | 1 |
| GATA6      | 1 |
| GATA6      | 1 |
| DRD2/DNMT3 | 3 |
| DRD2/CRYBA | 2 |
| DRD2       | 1 |
| KLRD1      | 1 |
| DRD2       | 1 |
| WNT7B      | 1 |
| KLRD1      | 1 |
| CLDN7      | 1 |
| DRD2       | 1 |
| WNT7B      | 1 |
| DRD2       | 1 |
| DCT        | 1 |
| DRD2       | 1 |
| GATA6      | 1 |
| GATA6      | 1 |
| DNMT3A     | 1 |
| GATA6      | 1 |
| DRD2       | 1 |
| KLRD1/DRD2 | 2 |
| KLRD1      | 1 |
| GATA6      | 1 |
| DCT        | 1 |
| DNMT3A     | 1 |
| DRD2       | 1 |
| DRD2       | 1 |
| GATA6      | 1 |
| CRYBA1     | 1 |
| CXCL13     | 1 |
| DRD2/COL13 | 2 |
| DRD2       | 1 |
| DRD2       | 1 |
| DCT        | 1 |
| CXCL13     | 1 |
| DCT        | 1 |
| GATA6      | 1 |
| WNT7B      | 1 |

|            |   |
|------------|---|
| CXCL13     | 1 |
| MPP7/CLDN7 | 2 |
| WNT7B/GAT4 | 2 |
| DRD2       | 1 |
| DRD2       | 1 |
| KLRD1      | 1 |
| DRD2       | 1 |
| KLRD1      | 1 |
| DRD2       | 1 |
| WNT7B      | 1 |
| DRD2       | 1 |
| NEK2       | 1 |
| COL13A1    | 1 |
| DRD2       | 1 |
| ALDOB      | 1 |
| GATA6      | 1 |
| COL13A1    | 1 |
| DRD2       | 1 |
| DRD2       | 1 |
| DRD2/CRYBA | 2 |
| CXCL13     | 1 |
| KLRD1      | 1 |
| SNX25      | 1 |
| DRD2       | 1 |
| TNRC6C     | 1 |
| GATA6      | 1 |
| ALDOB      | 1 |
| DRD2       | 1 |
| CXCL13     | 1 |
| MPP7/WNT7  | 2 |
| KLRD1/DRD2 | 2 |
| GATA6      | 1 |
| DCT        | 1 |
| GATA6      | 1 |
| GATA6      | 1 |
| ALDOB      | 1 |
| HHAT       | 1 |
| CENPI      | 1 |
| KLRD1      | 1 |
| DRD2       | 1 |
| GATA6      | 1 |
| GATA6      | 1 |
| PLEKHM1    | 1 |
| DRD2       | 1 |
| DRD2/DCT   | 2 |
| WNT7B      | 1 |
| DRD2       | 1 |
| DRD2       | 1 |
| CXCL13     | 1 |
| GATA6      | 1 |

|             |   |
|-------------|---|
| DRD2        | 1 |
| DRD2        | 1 |
| DRD2        | 1 |
| HHAT        | 1 |
| DRD2        | 1 |
| ARHGEF7/CO  | 2 |
| DRD2        | 1 |
| DRD2        | 1 |
| NEK2        | 1 |
| CRYBA1      | 1 |
| DRD2        | 1 |
| DRD2        | 1 |
| NEK2        | 1 |
| MPP7/CXCL1: | 2 |
| ARHGEF7     | 1 |
| NEK2        | 1 |
| DRD2        | 1 |
| DRD2        | 1 |
| GATA6       | 1 |
| CXCL13      | 1 |
| ARHGEF7     | 1 |
| DRD2        | 1 |
| DRD2        | 1 |
| WNT7B       | 1 |
| GATA6       | 1 |
| CYP2U1      | 1 |
| DRD2        | 1 |
| ARHGEF7     | 1 |
| NEK2        | 1 |
| GATA6       | 1 |
| DRD2        | 1 |
| DRD2/DNMT:  | 2 |
| KLRD1       | 1 |
| NEK2        | 1 |
| DNMT3A      | 1 |
| DRD2        | 1 |
| CXCL13/ARHC | 2 |
| ARHGEF7     | 1 |
| DRD2        | 1 |
| KLRD1/DRD2  | 2 |
| WNT7B/GAT/  | 2 |
| GATA6/DRD2  | 2 |
| GATA6       | 1 |
| GATA6       | 1 |
| GATA6       | 1 |
| ARHGEF7     | 1 |
| DRD2        | 1 |
| DRD2/DNMT:  | 2 |
| DRD2        | 1 |
| DRD2        | 1 |

|            |   |
|------------|---|
| CXCL13     | 1 |
| DRD2       | 1 |
| GATA6      | 1 |
| DRD2       | 1 |
| DRD2       | 1 |
| DRD2       | 1 |
| GATA6      | 1 |
| DRD2       | 1 |
| DRD2       | 1 |
| DRD2       | 1 |
| CRYBA1     | 1 |
| KLRD1      | 1 |
| PLEKHM1    | 1 |
| DCT        | 1 |
| WNT7B      | 1 |
| PLEKHM1    | 1 |
| DRD2/DCT   | 2 |
| DRD2       | 1 |
| GATA6      | 1 |
| DCT        | 1 |
| GATA6      | 1 |
| GATA6/CENP | 2 |
| GATA6      | 1 |
| DRD2       | 1 |
| ALDOB      | 1 |
| GATA6      | 1 |
| DNMT3A     | 1 |
| DRD2       | 1 |
| ARHGEF7    | 1 |
| DRD2       | 1 |
| NEK2       | 1 |
| DRD2       | 1 |
| KLRD1      | 1 |
| CXCL13     | 1 |
| KLRD1      | 1 |
| DRD2       | 1 |
| DRD2       | 1 |
| HHAT       | 1 |
| DRD2       | 1 |
| DNMT3A     | 1 |
| WNT7B      | 1 |
| SCD        | 1 |
| DCT        | 1 |
| PLEKHM1    | 1 |
| ARHGEF7    | 1 |
| DRD2       | 1 |
| GATA6      | 1 |

|             |   |
|-------------|---|
| KLRD1       | 1 |
| NEK2        | 1 |
| NEK2        | 1 |
| DRD2        | 1 |
| KLRD1       | 1 |
| DRD2        | 1 |
| NEK2        | 1 |
| DRD2        | 1 |
| DRD2        | 1 |
| SNX25/CXCL1 | 2 |
| GATA6       | 1 |
| KLRD1       | 1 |
| DRD2        | 1 |
| DRD2        | 1 |
| GATA6       | 1 |
| COL13A1     | 1 |
| ARHGEF7     | 1 |
| DRD2        | 1 |
| GATA6       | 1 |
| ARHGEF7     | 1 |
| LARP4/ARHG  | 2 |
| DRD2/CRYBA  | 2 |
| CXCL13/CXCL | 2 |
| TNRC6C      | 1 |
| KLRD1       | 1 |
| DRD2        | 1 |
| DRD2        | 1 |
| PLEKHM1     | 1 |
| GATA6       | 1 |
| DRD2        | 1 |
| DRD2        | 1 |
| ARHGEF7     | 1 |
| DRD2        | 1 |
| DRD2        | 1 |
| GATA6       | 1 |
| CXCL13/DRD: | 2 |
| DRD2/DCT    | 2 |
| KLRD1       | 1 |
| CYP2U1      | 1 |
| DRD2        | 1 |
| DRD2        | 1 |
| GATA6       | 1 |
| GATA6/DCT   | 2 |
| DCT         | 1 |
| COL13A1     | 1 |
| DRD2        | 1 |
| NEK2        | 1 |
| CXCL13      | 1 |
| DRD2        | 1 |
| DCT         | 1 |



|                  |   |
|------------------|---|
| SNX25            | 1 |
| GATA6/DRD2       | 2 |
| DRD2/CRYBA       | 2 |
| KLRD1            | 1 |
| KLRD1            | 1 |
| DRD2             | 1 |
| CXCL13           | 1 |
| SCD              | 1 |
| DRD2             | 1 |
| PLEKHM1          | 1 |
| GATA6            | 1 |
| SNX25            | 1 |
| CXCL13           | 1 |
| NEK2             | 1 |
| CXCL13           | 1 |
| WNT7B            | 1 |
| CXCL13           | 1 |
| NEK2             | 1 |
| SNX25/DRD2       | 2 |
| CXCL13/GATA6     | 2 |
| WNT7B            | 1 |
| CXCL13/DRD2      | 2 |
| DRD2             | 1 |
| KLRD1            | 1 |
| DRD2             | 1 |
| GATA6            | 1 |
| CXCL13/ARHGGEF7  | 2 |
| CXCL13/GATA6     | 2 |
| NEK2             | 1 |
| WNT7B            | 1 |
| DRD2             | 1 |
| DRD2             | 1 |
| PLEKHM1/ARHGGEF7 | 2 |
| CXCL13/DRD2      | 2 |
| KLRD1            | 1 |
| DRD2             | 1 |
| DRD2             | 1 |
| DNMT3A           | 1 |
| CXCL13/KLRD1     | 2 |
| GATA6/CRYBA      | 2 |
| ARHGGEF7         | 1 |
| CXCL13           | 1 |
| DRD2             | 1 |
| GATA6            | 1 |
| CXCL13/DRD2      | 2 |
| GATA6            | 1 |
| DRD2             | 1 |
| WNT7B            | 1 |
| ARHGGEF7/CRYBA   | 2 |
| ARHGGEF7/NEK2    | 2 |

|             |   |
|-------------|---|
| GATA6       | 1 |
| DRD2/DCT    | 2 |
| NEK2        | 1 |
| GATA6       | 1 |
| CXCL13/DRD: | 2 |
| DNMT3A      | 1 |
| DNMT3A      | 1 |
| GATA6       | 1 |
| DRD2        | 1 |
| GATA6       | 1 |
| GATA6       | 1 |
| PLEKHM1     | 1 |
| DRD2/DNMT:  | 2 |
| DRD2        | 1 |
| DRD2        | 1 |
| CRYBA1      | 1 |
| ARHGEF7     | 1 |
| GATA6       | 1 |
| WNT7B       | 1 |
| NEK2        | 1 |
| ARHGEF7     | 1 |
| DNMT3A      | 1 |
| ALDOB       | 1 |
| NEK2        | 1 |
| DRD2        | 1 |
| SNX25       | 1 |
| WNT7B       | 1 |
| SNX25/DRD2  | 2 |
| WNT7B       | 1 |
| KLRD1       | 1 |
| ALDOB       | 1 |
| FGF5        | 1 |
| NEK2        | 1 |
| ARHGEF7     | 1 |
| DRD2        | 1 |
| CYP2U1/SCD  | 2 |
| CXCL13/DRD: | 2 |
| DRD2        | 1 |
| DRD2        | 1 |
| DCT         | 1 |
| TNRC6C      | 1 |
| WNT7B       | 1 |
| KLRD1       | 1 |
| GATA6       | 1 |
| DRD2        | 1 |
| DRD2        | 1 |
| PLEKHM1     | 1 |
| DRD2        | 1 |
| ARHGEF7     | 1 |
| TNRC6C      | 1 |

|             |   |
|-------------|---|
| ARHGEF7     | 1 |
| TNRC6C      | 1 |
| CXCL13      | 1 |
| WNT7B       | 1 |
| DRD2        | 1 |
| TNRC6C      | 1 |
| DRD2        | 1 |
| TNRC6C      | 1 |
| ALDOB       | 1 |
| PLEKHM1     | 1 |
| ARHGEF7     | 1 |
| WNT7B/COL1  | 2 |
| GATA6       | 1 |
| TNRC6C      | 1 |
| DRD2        | 1 |
| WNT7B       | 1 |
| HHAT        | 1 |
| DRD2        | 1 |
| DRD2        | 1 |
| DRD2        | 1 |
| DNMT3A      | 1 |
| COL13A1     | 1 |
| WNT7B       | 1 |
| DNMT3A      | 1 |
| DRD2        | 1 |
| DRD2        | 1 |
| CXCL13      | 1 |
| WNT7B       | 1 |
| MPP7        | 1 |
| ARHGEF7     | 1 |
| DRD2        | 1 |
| ARHGEF7     | 1 |
| HHAT        | 1 |
| GATA6       | 1 |
| CXCL13      | 1 |
| SCD         | 1 |
| CXCL13      | 1 |
| CXCL13      | 1 |
| WNT7B/DRD:  | 2 |
| CXCL13/KLRD | 2 |
| WNT7B/COL1  | 2 |
| GATA6       | 1 |
| ALDOB       | 1 |
| DRD2        | 1 |
| DRD2        | 1 |
| KLRD1       | 1 |
| DRD2        | 1 |
| DNMT3A      | 1 |
| DRD2        | 1 |
| DRD2        | 1 |

|                |   |
|----------------|---|
| DRD2           | 1 |
| KLRD1/DRD2     | 2 |
| DRD2           | 1 |
| ALDOB          | 1 |
| ARHGEF7        | 1 |
| CXCL13/ARHGEF7 | 2 |
| GATA6          | 1 |
| DRD2           | 1 |
| DRD2           | 1 |
| GATA6          | 1 |
| ALDOB          | 1 |
| ALDOB          | 1 |
| CXCL13         | 1 |
| DRD2           | 1 |
| SNX25/DRD2     | 2 |
| SNX25/DRD2     | 2 |
| DRD2           | 1 |
| GATA6          | 1 |
| CRYBA1         | 1 |
| GATA6          | 1 |
| DRD2/DCT       | 2 |
| WNT7B/DRD2     | 2 |
| DRD2           | 1 |
| DNMT3A         | 1 |
| PLEKHM1        | 1 |
| WNT7B/DRD2     | 2 |
| NEK2           | 1 |
| DRD2           | 1 |
| ALDOB          | 1 |
| PLEKHM1        | 1 |
| ALDOB          | 1 |
| GATA6          | 1 |
| DRD2           | 1 |
| NEK2           | 1 |
| CXCL13/DRD2    | 2 |
| DRD2           | 1 |
| DRD2           | 1 |
| DRD2           | 1 |
| GATA6/DRD2     | 2 |
| ARHGEF7        | 1 |
| KLRD1          | 1 |
| DRD2           | 1 |
| DRD2           | 1 |
| DRD2           | 1 |
| WNT7B          | 1 |
| KLRD1          | 1 |
| DRD2           | 1 |
| DRD2           | 1 |
| NEK2           | 1 |
| DRD2           | 1 |

|                 |   |
|-----------------|---|
| PLEKHM1         | 1 |
| CYP2U1          | 1 |
| CRYBA1          | 1 |
| DRD2            | 1 |
| DRD2            | 1 |
| DRD2            | 1 |
| CXCL13          | 1 |
| CXCL13/DRD2     | 2 |
| TNRC6C          | 1 |
| CYP2U1          | 1 |
| CXCL13          | 1 |
| KLRD1           | 1 |
| DRD2            | 1 |
| DRD2            | 1 |
| PLEKHM1         | 1 |
| GATA6/DRD2      | 2 |
| LARP4/TNRC6C    | 2 |
| DRD2            | 1 |
| CXCL13          | 1 |
| CXCL13          | 1 |
| DNMT3A          | 1 |
| DRD2            | 1 |
| NEK2            | 1 |
| CXCL13          | 1 |
| CXCL13/ARHGGEF7 | 2 |
| DRD2            | 1 |
| DRD2            | 1 |
| NEK2            | 1 |
| DRD2            | 1 |
| TNRC6C          | 1 |
| WNT7B/DRD2      | 2 |
| DNMT3A          | 1 |
| NEK2            | 1 |
| GATA6           | 1 |
| GATA6           | 1 |
| DRD2            | 1 |
| GATA6           | 1 |
| DNMT3A          | 1 |
| CXCL13          | 1 |
| ARHGGEF7        | 1 |
| DRD2            | 1 |
| CXCL13          | 1 |
| CXCL13/DRD2     | 2 |
| CYP2U1          | 1 |
| ARHGGEF7        | 1 |
| KLRD1           | 1 |
| ALDOB           | 1 |
| GATA6           | 1 |
| CXCL13          | 1 |
| CRYBA1          | 1 |

|         |   |
|---------|---|
| WNT7B   | 1 |
| GATA6   | 1 |
| DRD2    | 1 |
| SNX25   | 1 |
| DRD2    | 1 |
| WNT7B   | 1 |
| NEK2    | 1 |
| DRD2    | 1 |
| NEK2    | 1 |
| KLRD1   | 1 |
| SNX25   | 1 |
| SNX25   | 1 |
| DRD2    | 1 |
| DRD2    | 1 |
| WNT7B   | 1 |
| WNT7B   | 1 |
| DRD2    | 1 |
| KLRD1   | 1 |
| DRD2    | 1 |
| DRD2    | 1 |
| DNMT3A  | 1 |
| CXCL13  | 1 |
| HHAT    | 1 |
| LARP4   | 1 |
| WNT7B   | 1 |
| DRD2    | 1 |
| WNT7B   | 1 |
| GATA6   | 1 |
| DRD2    | 1 |
| HHAT    | 1 |
| NEK2    | 1 |
| GATA6   | 1 |
| ARHGEF7 | 1 |
| DNMT3A  | 1 |
| PLEKHM1 | 1 |
| CXCL13  | 1 |
| GATA6   | 1 |
| WNT7B   | 1 |
| DRD2    | 1 |
| MPP7    | 1 |
| NEK2    | 1 |
| DRD2    | 1 |
| DRD2    | 1 |
| CRYBA1  | 1 |
| SCD     | 1 |
| SCD     | 1 |
| DRD2    | 1 |
| DRD2    | 1 |
| DRD2    | 1 |
| GATA6   | 1 |

|         |   |
|---------|---|
| WNT7B   | 1 |
| NEK2    | 1 |
| DRD2    | 1 |
| DNMT3A  | 1 |
| DRD2    | 1 |
| WNT7B   | 1 |
| ARHGEF7 | 1 |
| CXCL13  | 1 |
| GATA6   | 1 |
| DRD2    | 1 |
| CYP2U1  | 1 |
| ALDOB   | 1 |
| DRD2    | 1 |
| GATA6   | 1 |
| ARHGEF7 | 1 |
| PLEKHM1 | 1 |
| SCD     | 1 |
| TNRC6C  | 1 |
| NEK2    | 1 |
| DRD2    | 1 |
| DRD2    | 1 |
| DRD2    | 1 |
| GATA6   | 1 |
| DRD2    | 1 |
| LARP4   | 1 |
| NEK2    | 1 |
| SCD     | 1 |
| ARHGEF7 | 1 |
| PLEKHM1 | 1 |
| DRD2    | 1 |
| GATA6   | 1 |
| DRD2    | 1 |
| GATA6   | 1 |
| GATA6   | 1 |
| TNRC6C  | 1 |
| WNT7B   | 1 |
| WNT7B   | 1 |
| ARHGEF7 | 1 |
| NEK2    | 1 |
| KLRD1   | 1 |
| KLRD1   | 1 |
| KLRD1   | 1 |
| TNRC6C  | 1 |
| DRD2    | 1 |
| DRD2    | 1 |
| DNMT3A  | 1 |
| PLEKHM1 | 1 |
| CYP2U1  | 1 |
| GATA6   | 1 |
| CRYBA1  | 1 |

|         |   |
|---------|---|
| DRD2    | 1 |
| DRD2    | 1 |
| CRYBA1  | 1 |
| NEK2    | 1 |
| GATA6   | 1 |
| DRD2    | 1 |
| GATA6   | 1 |
| CRYBA1  | 1 |
| DRD2    | 1 |
| KLRD1   | 1 |
| NEK2    | 1 |
| DRD2    | 1 |
| GATA6   | 1 |
| DRD2    | 1 |
| PLEKHM1 | 1 |
| NEK2    | 1 |
| KLRD1   | 1 |
| PLEKHM1 | 1 |
| WNT7B   | 1 |
| WNT7B   | 1 |
| DRD2    | 1 |
| WNT7B   | 1 |
| DCT     | 1 |
| CXCL13  | 1 |
| DRD2    | 1 |
| SNX25   | 1 |
| DRD2    | 1 |
| DRD2    | 1 |
| DRD2    | 1 |
| NEK2    | 1 |
| CENPI   | 1 |
| NEK2    | 1 |
| GATA6   | 1 |
| DRD2    | 1 |
| DRD2    | 1 |
| COL13A1 | 1 |
| DRD2    | 1 |
| GATA6   | 1 |
| DRD2    | 1 |
| CXCL13  | 1 |
| CXCL13  | 1 |
| DRD2    | 1 |
| SCD     | 1 |
| CRYBA1  | 1 |
| DRD2    | 1 |
| DRD2    | 1 |



|         |   |
|---------|---|
| DRD2    | 1 |
| CRYBA1  | 1 |
| WNT7B   | 1 |
| COL13A1 | 1 |
| CXCL13  | 1 |
| GATA6   | 1 |
| ARHGEF7 | 1 |
| CXCL13  | 1 |
| CXCL13  | 1 |
| FGF5    | 1 |
| KLRD1   | 1 |
| GATA6   | 1 |
| NEK2    | 1 |
| DRD2    | 1 |
| WNT7B   | 1 |
| CXCL13  | 1 |
| DRD2    | 1 |
| TNRC6C  | 1 |
| CXCL13  | 1 |
| DRD2    | 1 |
| ARHGEF7 | 1 |
| WNT7B   | 1 |
| KLRD1   | 1 |
| DRD2    | 1 |
| GATA6   | 1 |
| DRD2    | 1 |
| ALDOB   | 1 |
| DCT     | 1 |
| WNT7B   | 1 |
| ARHGEF7 | 1 |
| DRD2    | 1 |
| DRD2    | 1 |
| CENPI   | 1 |
| DRD2    | 1 |
| HHAT    | 1 |
| DRD2    | 1 |
| DRD2    | 1 |
| TNRC6C  | 1 |
| GATA6   | 1 |
| CXCL13  | 1 |
| WNT7B   | 1 |
| DRD2    | 1 |
| GATA6   | 1 |
| DRD2    | 1 |
| SNX25   | 1 |
| DRD2    | 1 |
| WNT7B   | 1 |
| DRD2    | 1 |
| DRD2    | 1 |
| SNX25   | 1 |

|         |   |
|---------|---|
| SNX25   | 1 |
| DRD2    | 1 |
| ALDOB   | 1 |
| NEK2    | 1 |
| GATA6   | 1 |
| DRD2    | 1 |
| DRD2    | 1 |
| PLEKHM1 | 1 |
| DRD2    | 1 |
| TNRC6C  | 1 |
| DRD2    | 1 |
| CLDN7   | 1 |
| DRD2    | 1 |
| ALDOB   | 1 |
| TNRC6C  | 1 |
| DRD2    | 1 |
| KLRD1   | 1 |
| CXCL13  | 1 |
| DRD2    | 1 |
| NEK2    | 1 |
| DRD2    | 1 |
| GATA6   | 1 |
| DCT     | 1 |
| DRD2    | 1 |
| CXCL13  | 1 |
| NEK2    | 1 |
| TNRC6C  | 1 |
| KLRD1   | 1 |
| KLRD1   | 1 |
| PLEKHM1 | 1 |
| CXCL13  | 1 |
| WNT7B   | 1 |
| NEK2    | 1 |
| DRD2    | 1 |
| DRD2    | 1 |
| ARHGEF7 | 1 |
| DRD2    | 1 |
| PLEKHM1 | 1 |
| COL13A1 | 1 |
| FGF5    | 1 |
| DRD2    | 1 |
| COL13A1 | 1 |
| WNT7B   | 1 |
| DRD2    | 1 |
| WNT7B   | 1 |
| COL13A1 | 1 |
| DRD2    | 1 |

|         |   |
|---------|---|
| DRD2    | 1 |
| SCD     | 1 |
| PLEKHM1 | 1 |
| KLRD1   | 1 |
| SCD     | 1 |
| DNMT3A  | 1 |
| DRD2    | 1 |
| WNT7B   | 1 |
| WNT7B   | 1 |
| KLRD1   | 1 |
| DNMT3A  | 1 |
| WNT7B   | 1 |
| CXCL13  | 1 |
| NEK2    | 1 |
| DRD2    | 1 |
| ARHGEF7 | 1 |
| KLRD1   | 1 |
| CXCL13  | 1 |
| DRD2    | 1 |
| DRD2    | 1 |
| SNX25   | 1 |
| CXCL13  | 1 |
| DRD2    | 1 |
| DRD2    | 1 |
| NEK2    | 1 |
| DRD2    | 1 |
| CXCL13  | 1 |
| CXCL13  | 1 |
| DNMT3A  | 1 |
| CXCL13  | 1 |
| NEK2    | 1 |
| ALDOB   | 1 |
| DRD2    | 1 |
| CXCL13  | 1 |
| KLRD1   | 1 |
| DRD2    | 1 |
| GATA6   | 1 |
| WNT7B   | 1 |
| ARHGEF7 | 1 |
| GATA6   | 1 |
| DNMT3A  | 1 |
| GATA6   | 1 |
| ALDOB   | 1 |
| NEK2    | 1 |
| DRD2    | 1 |
| ALDOB   | 1 |
| ALDOB   | 1 |
| DRD2    | 1 |
| GATA6   | 1 |
| DRD2    | 1 |

|        |   |
|--------|---|
| TNRC6C | 1 |
| DNMT3A | 1 |
| ALDOB  | 1 |
| DRD2   | 1 |
| DRD2   | 1 |
| DRD2   | 1 |
| TNRC6C | 1 |
| DRD2   | 1 |
| WNT7B  | 1 |
| NEK2   | 1 |
| DRD2   | 1 |
| KLRD1  | 1 |
| DRD2   | 1 |
| TNRC6C | 1 |
| DRD2   | 1 |
| CXCL13 | 1 |
| TNRC6C | 1 |
| DRD2   | 1 |
| NEK2   | 1 |
| DRD2   | 1 |
| TNRC6C | 1 |
| DRD2   | 1 |
| DRD2   | 1 |
| KLRD1  | 1 |
| DRD2   | 1 |
| CXCL13 | 1 |
| DNMT3A | 1 |
| NEK2   | 1 |
| ALDOB  | 1 |
| ALDOB  | 1 |
| DRD2   | 1 |
| TNRC6C | 1 |
| TNRC6C | 1 |
| ALDOB  | 1 |

| geneID      | Count |
|-------------|-------|
| DRD2/DCT    | 2     |
| CXCL13/CXCL | 3     |
| DRD2/DCT    | 2     |
| WNT7B/GAT#  | 2     |
| CXCL13/GAT# | 2     |
| DRD2/DCT    | 2     |
| DRD2/DNMT:  | 2     |
| DRD2/CRYBA  | 2     |
| DRD2/DCT    | 2     |
| MPP7/ARHG#  | 4     |
| HHAT        | 1     |
| DRD2        | 1     |
